# Supplementary material
Source: PubMed Central journal article supplement (PMC2488150)
Supplement: NIHMS54383-supplement-01.pdf [file NIHMS54383-supplement-01.pdf]

**Table S1.** Percent wildtype activity of the *flgKL* class 3 promoter mutants from Figure 3.

| Position | Mutation |     |     |     |
|----------|----------|-----|-----|-----|
|          | A        | T   | G   | C   |
| -59 T    | 70       | 100 | 56  | 31  |
| -58 C    | 111      | 105 | 95  | 100 |
| -57 A    | 100      | 55  | 60  | 69  |
| -56 A    | 100      | 86  | 79  | 76  |
| -55 G    | 82       | 83  | 100 | 89  |
| -54 T    | 79       | 100 | 95  | 101 |
| -53 C    | 99       | 101 | 104 | 100 |
| -52 C    | 110      | 98  | 109 | 100 |
| -41 T    | 104      | 100 | 106 | 103 |
| -40 G    | 100      | 85  | 100 | 50  |
| -39 C    | 92       | 94  | 53  | 100 |
| -38 C    | 2.9      | 1.9 | 2.0 | 100 |
| -37 G    | 12       | 4.2 | 100 | 1.9 |
| -36 A    | 100      | 71  | 3.5 | 9.9 |
| -35 T    | 88       | 100 | 48  | 75  |
| -34 A    | 100      | 77  | 79  | 44  |
| -33 A    | 100      | 100 | 89  | 100 |

Except for Table S7, the  $\beta$ -galactosidase activities of all mutants in the supplemental tables are normalized to the activity of the wildtype promoter (100%).

**Table S2.** Percent wildtype activity of the *fliAZY* class 2 promoter mutants from Figure 5.

| Position | Mutation |     |     |     |
|----------|----------|-----|-----|-----|
|          | A        | T   | G   | C   |
| -105 A   | 100      | 148 | 106 | 171 |
| -104 C   | 141      | 117 | 111 | 100 |
| -103 A   | 100      | 57  | 55  | 44  |
| -100 A   | 100      | 74  | 121 | 116 |
| -96 A    | 100      | 61  | 131 | 50  |
| -91 A    | 100      | 66  | 82  | 64  |
| -90 C    | 107      | 39  | 129 | 100 |
| -89 C    | 116      | 73  | 112 | 100 |
| -84 T    | 82       | 100 | 64  | 59  |
| -83 T    | 58       | 100 | 36  | 40  |
| -82 T    | 57       | 100 | 34  | 43  |
| -81 T    | 65       | 100 | 50  | 64  |
| -76 C    | 63       | 93  | 67  | 100 |
| -75 C    | 61       | 111 | 99  | 100 |
| -74 T    | 57       | 100 | 61  | 88  |
| -73 T    | 29       | 100 | 4.4 | 3.8 |
| -72 A    | 100      | 77  | 66  | 34  |
| -71 T    | 72       | 100 | 17  | 43  |
| -70 T    | 7.7      | 100 | 7.5 | 21  |
| -69 C    | 38       | 74  | 30  | 100 |
| -68 C    | 91       | 103 | 103 | 100 |
| -67 T    | 113      | 100 | 99  | 107 |
| -66 T    | 78       | 100 | 92  | 108 |
| -65 C    | 58       | 74  | 73  | 100 |
| -64 G    | 72       | 45  | 100 | 61  |
| -63 A    | 100      | 51  | 27  | 25  |
| -62 T    | 30       | 100 | 4.1 | 12  |
| -61 A    | 100      | 140 | 76  | 86  |
| -60 G    | 93       | 32  | 100 | 48  |

**Table S3.** Percent wildtype activity for mutating the same base pairs in different class 2 promoters.

| <i>fliAZY</i> mutation | change in log-odds score | <i>fliAZY</i> | <i>fliDST</i> |
|------------------------|--------------------------|---------------|---------------|
| -96 A->G               | -0.2                     | 131           | 37            |
| -71 T->C               | -2.2                     | 43            | 52            |
| -70 T->C               | -3.9                     | 21            | 25            |

**Table S4.** Percent wildtype activity for mutating the same base pairs in different class 3 promoters.

| <i>flgKL</i> mutation | change in log-odds score | <i>flgKL</i> | <i>fliAZY</i> | <i>fliDST</i> | <i>flgMN</i> |
|-----------------------|--------------------------|--------------|---------------|---------------|--------------|
| -59 T->C              | -3.6                     | 31           | 28            |               |              |
| -57 A->C              | -2.8                     | 69           |               | 75            |              |
| -56 A->G              | -3.6                     | 79           | 65            |               |              |
| -56 A->T              | -3.6                     | 86           | 87            |               |              |
| -55 G->A              | -3.7                     | 82           | 90            |               |              |
| -41 T->C              | -3.2                     | 103          |               | 102           |              |
| -40 G->A              | -3.1                     | 100          | 36            |               |              |
| -38 C->T              | -4.0                     | 1.9          | 1.1           |               | 1.6          |
| -37 G->A              | -4.0                     | 12           | 3.2           | 26            |              |
| -36 A->T              | -3.6                     | 71           | 43            |               |              |
| -35 T->C              | -3.5                     | 75           | 43            | 98            |              |
| -34 A->C              | -3.6                     | 44           | 27            |               |              |
| -34 A->G              | -2.7                     | 79           | 51            | 88            |              |
| -33 A->G              | -3.4                     | 89           |               | 87            |              |

**Table S5.** Experimental and predicted activities of double mutants in the *fliAZY* FlhD<sub>2</sub>C<sub>2</sub> binding site from Figure 8.

| Strain  | Mutations           | Double mutant | Mutation #1 | Mutation #2 | Predicted |
|---------|---------------------|---------------|-------------|-------------|-----------|
| TH11730 | -71 T->A, -74 T->G  | 46            | 72          | 61          | 44        |
| TH11709 | -71 T->C, -74 T->A  | 38            | 43          | 57          | 24        |
| TH11710 | -71 T->G, -74 T->G  | 14            | 17          | 61          | 10        |
| TH12496 | -66 T->C, -73 T->A  | 23            | 108         | 29          | 31        |
| TH11704 | -64 G->A, -72 A->C  | 20            | 72          | 34          | 24        |
| TH11706 | -64 G->A, -72 A->G  | 43            | 72          | 66          | 47        |
| TH11705 | -64 G->C, -72 A->C  | 15            | 61          | 34          | 21        |
| TH11707 | -64 G->C, -72 A->G  | 33            | 61          | 66          | 40        |
| TH11708 | -64 G->T, -72 A->G  | 25            | 45          | 66          | 30        |
| TH11713 | -61 A->T, -70 T->C  | 33            | 140         | 21          | 30        |
| TH11714 | -61 A->T, -70 T->G  | 11            | 140         | 7.5         | 11        |
| TH11703 | -63 A->T, -65 C->G  | 32            | 51          | 73          | 37        |
| TH11702 | -63 A->T, -65 C->T  | 24            | 51          | 74          | 38        |
| TH11712 | -61 A->T, -64 G->A  | 113           | 140         | 72          | 100       |
| TH11711 | -61 A->T, -64 G->T  | 64            | 140         | 45          | 63        |
| TH11722 | -76 C->A, -100 A->G | 70            | 63          | 121         | 77        |
| TH11723 | -76 C->G, -100 A->G | 89            | 67          | 121         | 81        |
| TH11724 | -76 C->G, -100 A->T | 47            | 67          | 74          | 49        |
| TH11720 | -76 C->T, -100 A->G | 111           | 93          | 121         | 113       |
| TH11721 | -76 C->T, -100 A->T | 63            | 93          | 74          | 69        |
| TH11717 | -69 C->A, -96 A->G  | 52            | 38          | 131         | 50        |
| TH11731 | -69 C->A, -96 A->T  | 17            | 38          | 61          | 23        |
| TH11719 | -69 C->G, -96 A->G  | 40            | 30          | 131         | 40        |
| TH11718 | -69 C->G, -96 A->T  | 12            | 30          | 61          | 18        |
| TH11716 | -69 C->T, -96 A->G  | 91            | 74          | 131         | 97        |
| TH11715 | -69 C->T, -96 A->T  | 36            | 74          | 61          | 45        |
| TH11696 | -65 C->A, -91 A->C  | 33            | 58          | 64          | 37        |
| TH11695 | -65 C->A, -91 A->G  | 45            | 58          | 82          | 47        |
| TH11697 | -65 C->A, -91 A->T  | 30            | 58          | 66          | 38        |
| TH11701 | -65 C->G, -91 A->C  | 45            | 73          | 64          | 47        |
| TH11700 | -65 C->G, -91 A->G  | 62            | 73          | 82          | 60        |
| TH11699 | -65 C->T, -91 A->C  | 41            | 74          | 64          | 48        |
| TH11698 | -65 C->T, -91 A->G  | 56            | 74          | 82          | 61        |
| TH10271 | -62 T->C, -90 C->T  | 6.6           | 39          | 12          | 4.7       |
| TH10425 | -77 G->A, -83 T->C  | 21            | 52          | 40          | 20        |

**Table S6.** Experimental and predicted activities of double mutants in the *flgKL* promoter from Figure 8.

| Strain  | Mutations        | Double mutant | Mutation #1 | Mutation #2 | Predicted |
|---------|------------------|---------------|-------------|-------------|-----------|
| TH11935 | -57A->G, -59T->G | 17            | 60          | 56          | 34        |
| TH11934 | -57A->C, -59T->G | 12            | 69          | 56          | 39        |
| TH11933 | -57A->C, -59T->C | 10            | 69          | 31          | 21        |
| TH11932 | -57A->T, -59T->C | 7.9           | 55          | 31          | 17        |
| TH11931 | -55G->T, -56A->C | 51            | 83          | 76          | 64        |
| TH11930 | -55G->A, -56A->C | 82            | 82          | 76          | 62        |
| TH11929 | -55G->A, -56A->T | 81            | 82          | 86          | 71        |
| TH11928 | -55G->T, -56A->T | 66            | 83          | 86          | 72        |
| TH11927 | -55G->A, -56A->G | 78            | 82          | 79          | 65        |
| TH11926 | -55G->T, -56A->G | 70            | 83          | 79          | 66        |
| TH11938 | -37G->T, -40G->C | 1.9           | 4.2         | 50          | 2.1       |
| TH11937 | -37G->A, -40G->T | 1.8           | 12          | 85          | 10        |
| TH11936 | -37G->T, -40G->T | 2.2           | 4.2         | 85          | 3.6       |
| TH11925 | -34A->T, -36A->T | 27            | 77          | 71          | 55        |
| TH11924 | -34A->C, -36A->T | 7.7           | 44          | 71          | 31        |
| TH11923 | -34A->T, -36A->C | 3.4           | 77          | 9.9         | 7.7       |
| TH11922 | -34A->G, -36A->C | 1.8           | 79          | 9.9         | 7.8       |
| TH11921 | -34A->T, -36A->G | 2.0           | 77          | 3.5         | 2.7       |
| TH11920 | -34A->G, -36A->G | 1.5           | 79          | 3.5         | 2.7       |
| TH11914 | -40G->C, -59T->C | 3.0           | 50          | 31          | 15        |
| TH11913 | -40G->T, -59T->C | 5.5           | 85          | 31          | 26        |
| TH11912 | -40G->C, -59T->G | 5.7           | 50          | 56          | 28        |
| TH11911 | -40G->T, -59T->G | 17            | 85          | 56          | 48        |
| TH11904 | -35T->G, -57A->C | 7.9           | 48          | 69          | 33        |
| TH11903 | -35T->A, -57A->C | 25            | 88          | 69          | 60        |
| TH11902 | -35T->G, -57A->G | 4.6           | 48          | 60          | 29        |
| TH11901 | -35T->A, -57A->G | 14            | 88          | 60          | 52        |
| TH11900 | -35T->G, -57A->T | 5.1           | 48          | 55          | 26        |
| TH11899 | -35T->A, -57A->T | 15            | 88          | 55          | 48        |
| TH11910 | -37G->A, -56A->C | 2.9           | 12          | 76          | 8.9       |
| TH11909 | -37G->T, -56A->C | 2.0           | 4.2         | 76          | 3.2       |
| TH11908 | -37G->C, -56A->G | 2.1           | 1.9         | 79          | 1.5       |
| TH11907 | -37G->A, -56A->G | 3.2           | 12          | 79          | 9.2       |
| TH11906 | -37G->C, -56A->T | 2.0           | 1.9         | 86          | 1.6       |
| TH11905 | -37G->A, -56A->T | 4.0           | 12          | 86          | 10        |
| TH11919 | -34A->C, -55G->C | 19            | 44          | 89          | 39        |
| TH11918 | -34A->T, -55G->C | 48            | 77          | 89          | 69        |
| TH11917 | -34A->T, -55G->T | 42            | 77          | 83          | 65        |
| TH11916 | -34A->C, -55G->T | 18            | 44          | 83          | 36        |
| TH11915 | -34A->C, -55G->A | 15            | 44          | 82          | 36        |

**Table S7.** Activity of *flgKL* class 3 promoter mutants when  $\sigma^{28}$  is expressed at different levels from the arabinose promoter.

| Mutations        | wt <i>ara</i> promoter |      | Para935  |      | Para936  |      |
|------------------|------------------------|------|----------|------|----------|------|
|                  | Activity               | SD   | Activity | SD   | Activity | SD   |
| -58 C->A         | 77                     | 3.5  | 54       | 4.4  | 30       | 0.61 |
| wildtype         | 73                     | 7.2  | 45       | 5.5  | 17       | 1.3  |
| -39 C->T         | 71                     | 4.3  | 30       | 1.5  | 7.9      | 0.57 |
| -55 G->C         | 69                     | 2.7  | 32       | 3.0  | 8.0      | 0.42 |
| -56 A->T         | 65                     | 3.2  | 29       | 2.5  | 6.9      | 0.47 |
| -55 G->A         | 65                     | 3.0  | 26       | 2.7  | 5.8      | 0.23 |
| -55 G->T         | 64                     | 1.9  | 28       | 2.6  | 6.5      | 0.48 |
| -34 A->T         | 64                     | 2.4  | 23       | 1.7  | 4.4      | 0.23 |
| -56 A->G         | 60                     | 3.2  | 23       | 1.7  | 4.8      | 0.09 |
| -36 A->T         | 56                     | 0.41 | 17       | 0.94 | 2.9      | 0.04 |
| -55G->A, -56A->T | 54                     | 3.2  | 19       | 1.9  | 3.8      | 0.19 |
| -57 A->C         | 52                     | 3.1  | 18       | 1.9  | 3.5      | 0.16 |
| -55G->T, -56A->G | 46                     | 1.0  | 15       | 0.50 | 2.7      | 0.13 |
| -40 G->C         | 39                     | 0.57 | 9.5      | 0.65 | 1.7      | 0.05 |
| -34 A->C         | 36                     | 0.32 | 8.9      | 0.54 | 1.5      | 0.03 |
| -34A->T, -55G->T | 25                     | 0.42 | 5.4      | 0.35 | 0.90     | 0.03 |
| -59 T->C         | 22                     | 0.29 | 4.8      | 0.24 | 0.92     | 0.02 |
| -34A->T, -36A->T | 16                     | 0.16 | 3.1      | 0.18 | 0.67     | 0.07 |
| -34A->C, -55G->C | 13                     | 0.10 | 2.6      | 0.17 | 0.54     | 0.10 |
| -37 G->A         | 9.8                    | 0.36 | 1.9      | 0.09 | 0.51     | 0.07 |
| -57A->C, -59T->T | 6.9                    | 0.18 | 1.5      | 0.10 | 0.43     | 0.06 |
| -37 G->T         | 3.5                    | 0.31 | 0.88     | 0.06 | 0.32     | 0.06 |
| -37G->A, -56A->G | 2.2                    | 0.14 | 0.64     | 0.08 | 0.36     | 0.06 |
| -37G->T, -40G->C | 1.3                    | 0.19 | 0.47     | 0.08 | 0.32     | 0.08 |

These  $\beta$ -galactosidase activities are expressed in units of nmol/min/OD650/ml.

**Table S8.** FlhD<sub>4</sub>C<sub>2</sub> binding sites used to construct the class 2 consensus sequences in Figure 5.

| Organism              | Position (bp) | Promoter    | Score (bits) | Sequence           |               |                    |
|-----------------------|---------------|-------------|--------------|--------------------|---------------|--------------------|
| <i>E. coli</i>        | 1130140       | <i>flgA</i> | 29.0         | TTATCGGCGGAATAAAC  | GCAAAATGGGT   | CGCTATTTATGCCGTTG  |
| <i>E. coli</i>        | 1986148       | <i>yecR</i> | 24.7         | GATGGCAAGAAATAGCG  | CCTGCCAGGC    | GTCTTTTCCGGCCATTG  |
| <i>E. coli</i>        | 1999873       | <i>fliA</i> | 24.5         | GTAACCCCAAATAACC   | CCTCATTTCCACC | CACTAATCGTCCGATTA  |
| <i>E. coli</i>        | 2011093       | <i>fliE</i> | 22.9         | CTATCCGCCAATAAAC   | CGTTTTTTTGT   | TGCTATTTAGCGCCTTT  |
| <i>E. coli</i>        | 2001764       | <i>fliD</i> | 22.1         | TAGTCGCCGAAATAC    | TTTCTCTGCC    | CCTTATTTCCCGCTATTA |
| <i>E. coli</i>        | 1964271       | <i>flhB</i> | 17.8         | AAAAGCCCTAAATCCCG  | CCTGTTTTGCC   | CCTTACTCAAACCATTG  |
| <i>E. coli</i>        | 2560013       | <i>yffO</i> | 17.3         | TAACGCCAAAATAGCG   | CTGAATTAATG   | GGTAATTATTGCGGTTT  |
| <i>E. coli</i>        | 617276        | <i>fepE</i> | 16.2         | TAAACCCATAATTACAG  | AAAATAATTATG  | GGTTTTTTTATTTGTTTG |
| <i>E. coli</i>        | 2017535       | <i>fliL</i> | 14.2         | TAACGTCAGAGGTAGCA  | CCGTAATCCGC   | GTCTTTTCCCGCTTTG   |
| <i>Erwinia</i>        | 1986012       | <i>fliA</i> | 32.1         | ACATGGCAGGAATAACC  | CTTCTTTTTTGA  | CGCTATTCAGGCGATTG  |
| <i>Erwinia</i>        | 1950873       | <i>flgA</i> | 23.3         | CCATCGAACGAATAGAC  | GCCAAATGCAG   | CGCTATTTATTGCCTTA  |
| <i>Erwinia</i>        | 1972546       | <i>fliE</i> | 21.4         | CGATGGGTCGATAAGGT  | GGCATTTTTTCG  | CGCTAATTGTGCGATTT  |
| <i>Erwinia</i>        | 1945431       | <i>flhB</i> | 20.9         | TATTCGTTAAAAAGCG   | TCGGTTTTTCT   | CGTTGTTCCAGCCATAA  |
| <i>Erwinia</i>        | 1965808       | <i>fliL</i> | 13.1         | TAAACGAATAAGTTAGC  | ACAATTTTCCCT  | GTCTATTCTCTGTATTG  |
| <i>Photobacterium</i> | 2281826       | <i>flgA</i> | 27.1         | CTATCGGATGAATAGAC  | GCTAATTGAAT   | TGCTATTTATCCCATTG  |
| <i>Photobacterium</i> | 2315186       | <i>fliF</i> | 23.5         | AAAGCGGTAATTAAG    | TAAAAAGTCAG   | GGCTTATTGTGCCATTA  |
| <i>Photobacterium</i> | 2256282       | <i>flhB</i> | 21.8         | CTATCCCGCAAATACCC  | GGTCAAAATTTCT | CATTGTTCCAGCCATCG  |
| <i>Photobacterium</i> | 2319770       | <i>fliD</i> | 20.2         | TGATAAGCCAAACAGCG  | TCGGTTCTTTCAC | GACTATTCCTACCATAG  |
| <i>Photobacterium</i> | 2321170       | <i>fliA</i> | 15.4         | GCATAGGTGAAAAAGAA  | GTGTTTTTACTA  | CATTGTTCAAACGATTG  |
| <i>Photobacterium</i> | 2308434       | <i>fliL</i> | 14.9         | TAAC TTCATAACAAACG | AACGAGTTAGT   | CGTTTTTTTCCCGCTTTG |
| <i>Proteus</i>        | 3855          | <i>fliA</i> | 23.6         | GCATAGGTGAAAAAGAG  | GGGCTTTTGCTT  | CACTGTTCCAGCCGATTG |
| <i>Proteus</i>        | 1487          | <i>flgA</i> | 23.0         | TGATTGGAGGAATAGGG  | GTAATTTGAAT   | TGCTATTTATGCGTTTA  |
| <i>Proteus</i>        | 105           | <i>flhB</i> | 22.4         | TCATAGCCCAAAGCC    | CCGTAAATTTGC  | GATTGTTCAACCCATCA  |
| <i>Salmonella</i>     | 1258146       | <i>flgA</i> | 26.3         | TTATCGCCGGAATAAAC  | GCAAAATGCGT   | CGCTATTTATTGCGTTG  |
| <i>Salmonella</i>     | 2049273       | <i>fliD</i> | 26.1         | TAGGCGGCGAAATAGCC  | GCTTTATGCAT   | CATTATTCCGCGCATTAA |
| <i>Salmonella</i>     | 2056379       | <i>fliF</i> | 24.0         | AAAGGCGTTAAATAACG  | ATAAAAAACCT   | CGGTTTTTTAGCGCATAG |
| <i>Salmonella</i>     | 2045526       | <i>fliA</i> | 20.9         | ACATAAGTGAAATAACC  | CTTCTTTTATAG  | CCTTATTCCTTCGATAG  |
| <i>Salmonella</i>     | 2062956       | <i>fliL</i> | 17.2         | TAACGCCAGAGGTAGCA  | TGATTATCCGC   | GTCTTTTCCACGCTTTG  |
| <i>Salmonella</i>     | 2011490       | <i>flhB</i> | 16.7         | TAACGCCATAAACCCCG  | CCTTTTTTACC   | GCTTACTCTGCCTATTG  |
| <i>Salmonella</i>     | 2047647       | <i>fliB</i> | 16.2         | GGTTCGCGAAAACGTCC  | TCTCTTFACTG   | CGTTAATCCGGCGATTG  |
| <i>Salmonella</i>     | 1679671       | <i>srfA</i> | 13.6         | TAATAGACCGAGAATTC  | GCGCCTTTTTG   | CCTTCTTCCGCCGTTT   |
| <i>Shigella</i>       | 1121554       | <i>flgB</i> | 29.0         | CAACGGCATAAATAGCG  | ACCCATTTTGC   | GTTTATTCCGCCGATAA  |
| <i>Shigella</i>       | 1974625       | <i>fliA</i> | 24.5         | GTAACCCCAAATAACC   | CCTCATTTCCACC | CACTAATCGTCCGATTA  |
| <i>Shigella</i>       | 1989665       | <i>fliF</i> | 22.9         | AAAGGCGCTAAATAGCA  | ACAAAAAACT    | GGTTTATTGGCGGATAG  |
| <i>Shigella</i>       | 1976516       | <i>fliD</i> | 20.5         | TAGTCGACGAAATAC    | TTTCTCTGCC    | CCTTATTTCCCGCTATTA |
| <i>Shigella</i>       | 1937672       | <i>flhB</i> | 18.4         | AAACGCCCTAAATCCCG  | CCTGTTTTGCC   | CCTTACTTAAACCATTG  |
| <i>Shigella</i>       | 1996008       | <i>fliL</i> | 13.8         | TAACGTCAGAGGTAGCA  | CCGTAATCCGC   | GTCTTTTCCCGCTTTG   |
| <i>Yersinia</i>       | 2025616       | <i>flgA</i> | 27.4         | CTATCGCCAGAATAAGC  | GCAAAATGCGT   | CGCTATTTGTCCCCTTA  |
| <i>Yersinia</i>       | 2069603       | <i>fliA</i> | 26.8         | GCATAAGCCAAATAGCC  | GCCCTTTTATAG  | GTCTATTTCCGGCGATTG |
| <i>Yersinia</i>       | 2058675       | <i>fliE</i> | 20.0         | CGATGGCTCAATAAGCC  | GGTATTTTTGT   | ATCTAATTAGCCGCTTT  |
| <i>Yersinia</i>       | 2016091       | <i>flhB</i> | 18.5         | CAATCTATCAATTAACC  | CACTGAATAATG  | CGTTGTTCCGAGCATAA  |
| <i>Yersinia</i>       | 2051703       | <i>fliL</i> | 16.3         | AAACGGCAAGCTAGGC   | CGTTTTTTCCC   | ACCTATTCTGCCTATTG  |
| <i>Yersinia</i>       | 2068032       | <i>fliD</i> | 12.0         | AATAGAGCAAATAGCCC  | CCTATTATCCCC  | TGCTATTTCCAGCCATCA |

**Table S9.** Mutant strains used in this paper.

| <b>Strain</b> | <b>Genotype</b>                                                                                                          |
|---------------|--------------------------------------------------------------------------------------------------------------------------|
| TH9301        | CRR4108[PflhDC5451::Tn10dTc[Δ25](Tc <sup>S</sup> )<br>ΔaraBAD943::fliA ΔfliA5647::FRT flgK5396::MudJ flgK6442 (-54 T->A) |
| TH9302        | " flgK6443 (-59 T->C)                                                                                                    |
| TH9303        | " flgK6444 (-55 G->A)                                                                                                    |
| TH9304        | " flgK6445 (-36 A->G)                                                                                                    |
| TH9305        | " flgK6446 (-33 A->G)                                                                                                    |
| TH9306        | " flgK6447 (-34 A->G)                                                                                                    |
| TH9307        | " flgK6448 (-41 T->C)                                                                                                    |
| TH9308        | " flgK6449 (-56 A->G)                                                                                                    |
| TH9309        | " flgK6450 (-64 A->G)                                                                                                    |
| TH9311        | " flgK6452 (-59 T->A)                                                                                                    |
| TH9312        | " flgK6453 (Δ-34A)                                                                                                       |
| TH9313        | " flgK6454 (-57 A->G)                                                                                                    |
| TH9441        | CRR4107[PflhDC5451::Tn10dTc[Δ25](Tc <sup>S</sup> )<br>ΔaraBAD956::fliA ΔfliA5647::FRT flgK5396::MudJ flgK6442 (-54 T->A) |
| TH9442        | " flgK6443 (-59 T->C)                                                                                                    |
| TH9443        | " flgK6444 (-55 G->A)                                                                                                    |
| TH9444        | " flgK6445 (-36 A->G)                                                                                                    |
| TH9445        | " flgK6446 (-33 A->G)                                                                                                    |
| TH9446        | " flgK6447 (-34 A->G)                                                                                                    |
| TH9447        | " flgK6448 (-41 T->C)                                                                                                    |
| TH9448        | " flgK6449 (-56 A->G)                                                                                                    |
| TH9449        | " flgK6450 (-64 A->G)                                                                                                    |
| TH9451        | " flgK6452 (-59 T->A)                                                                                                    |
| TH9452        | " flgK6453 (Δ-34A)                                                                                                       |
| TH9453        | " flgK6454 (-57 A->G)                                                                                                    |
| TH9579        | " flgK6469 (-40 G->A)                                                                                                    |
| TH9580        | " flgK6470 (-61 G->C)                                                                                                    |
| TH9581        | " flgK6471 (-58 C->T)                                                                                                    |
| TH9582        | " flgK6472 (-1 C->T)                                                                                                     |
| TH9583        | " flgK6473 (Δ-58C)                                                                                                       |
| TH9975        | " flgK6563 (-52 C->T)                                                                                                    |
| TH9976        | " flgK6564 (-53 C->T)                                                                                                    |
| TH9977        | " flgK6565 (-53 C->A)                                                                                                    |
| TH10001       | " flgK6570 (-34 A->C)                                                                                                    |
| TH10002       | " flgK6571 (-35 T->A)                                                                                                    |
| TH10003       | " flgK6572 (-35 T->G)                                                                                                    |
| TH10004       | " flgK6573 (-35 T->C)                                                                                                    |
| TH10005       | " flgK6574 (-36 A->T)                                                                                                    |
| TH10006       | " flgK6575 (-36 A->C)                                                                                                    |
| TH10007       | " flgK6576 (-37 G->C)                                                                                                    |
| TH10008       | " flgK6577 (-37 G->T)                                                                                                    |
| TH10009       | " flgK6578 (-37 G->A)                                                                                                    |



**Table S9 (Continued).** Mutant strains used in this paper.

|         |                                                                                                      |                             |
|---------|------------------------------------------------------------------------------------------------------|-----------------------------|
| TH10010 | CRR4107[PflhDC5451::Tn10dTc[Δ25](Tc <sup>S</sup> )<br>ΔaraBAD956::fliA ΔfliA5647::FRT flgK5396::MudJ | flgK6579 (-38 C->A)         |
| TH10011 | "                                                                                                    | flgK6580 (-39 C->G)         |
| TH10012 | "                                                                                                    | flgK6581 (-39 C->A)         |
| TH10013 | "                                                                                                    | flgK6582 (-40 G->T)         |
| TH10014 | "                                                                                                    | flgK6583 (-54 T->G)         |
| TH10015 | "                                                                                                    | flgK6584 (-55 G->T)         |
| TH10016 | "                                                                                                    | flgK6585 (-56 A->C)         |
| TH10017 | "                                                                                                    | flgK6586 (-56 A->T)         |
| TH10018 | "                                                                                                    | flgK6587 (-57 A->T)         |
| TH10019 | "                                                                                                    | flgK6588 (-58 C->G)         |
| TH10020 | "                                                                                                    | flgK6589 (-59 T->G)         |
| TH10021 | "                                                                                                    | flgK6590 (-40 G->C)         |
| TH10091 | "                                                                                                    | flgK6596 (-38 C->T)         |
| TH10092 | "                                                                                                    | flgK6597 (-38 C->G)         |
| TH10093 | "                                                                                                    | flgK6598 (-54 T->C)         |
| TH10094 | "                                                                                                    | flgK6599 (-57 A->C)         |
| TH10114 | "                                                                                                    | flgK6603 (-58 C->A)         |
| TH10115 | "                                                                                                    | flgK6604 (-39 C->T)         |
| TH10116 | "                                                                                                    | flgK6605 (-55 G->C)         |
| TH10127 | "                                                                                                    | flgK6606 (-34 A->T)         |
| TH11781 | "                                                                                                    | flgK7207 (-33 A->C)         |
| TH11782 | "                                                                                                    | flgK7208 (-33 A->T)         |
| TH11783 | "                                                                                                    | flgK7209 (-41 T->A)         |
| TH11784 | "                                                                                                    | flgK7210 (-41 T->G)         |
| TH11785 | "                                                                                                    | flgK7211 (-52 C->A)         |
| TH11786 | "                                                                                                    | flgK7212 (-52 C->G)         |
| TH11787 | "                                                                                                    | flgK7213 (-53 C->G)         |
| TH11899 | "                                                                                                    | flgK7238 (-35T->A, -57A->T) |
| TH11900 | "                                                                                                    | flgK7239 (-35T->G, -57A->T) |
| TH11901 | "                                                                                                    | flgK7240 (-35T->A, -57A->G) |
| TH11902 | "                                                                                                    | flgK7241 (-35T->G, -57A->G) |
| TH11903 | "                                                                                                    | flgK7242 (-35T->A, -57A->C) |
| TH11904 | "                                                                                                    | flgK7243 (-35T->G, -57A->C) |
| TH11905 | "                                                                                                    | flgK7244 (-37G->A, -56A->T) |
| TH11906 | "                                                                                                    | flgK7245 (-37G->C, -56A->T) |
| TH11907 | "                                                                                                    | flgK7246 (-37G->A, -56A->G) |
| TH11908 | "                                                                                                    | flgK7247 (-37G->C, -56A->G) |
| TH11909 | "                                                                                                    | flgK7248 (-37G->T, -56A->C) |
| TH11910 | "                                                                                                    | flgK7249 (-37G->A, -56A->C) |
| TH11911 | "                                                                                                    | flgK7250 (-40G->T, -59T->G) |
| TH11912 | "                                                                                                    | flgK7251 (-40G->C, -59T->G) |
| TH11913 | "                                                                                                    | flgK7252 (-40G->T, -59T->C) |
| TH11914 | "                                                                                                    | flgK7253 (-40G->C, -59T->C) |

**Table S9 (Continued).** Mutant strains used in this paper.

|         |                                                                                                                  |                             |
|---------|------------------------------------------------------------------------------------------------------------------|-----------------------------|
| TH11915 | CRR4107[PflhDC5451::Tn10dTc[Δ25](Tc <sup>S</sup> )<br>ΔaraBAD956::fliA ΔfliA5647::FRT flgK5396::MudJ             | flgK7254 (-34A->C, -55G->A) |
| TH11916 | "                                                                                                                | flgK7255 (-34A->C, -55G->T) |
| TH11917 | "                                                                                                                | flgK7256 (-34A->T, -55G->T) |
| TH11918 | "                                                                                                                | flgK7257 (-34A->T, -55G->C) |
| TH11919 | "                                                                                                                | flgK7258 (-34A->C, -55G->C) |
| TH11920 | "                                                                                                                | flgK7259 (-34A->G, -36A->G) |
| TH11921 | "                                                                                                                | flgK7260 (-34A->T, -36A->G) |
| TH11922 | "                                                                                                                | flgK7261 (-34A->G, -36A->C) |
| TH11923 | "                                                                                                                | flgK7262 (-34A->T, -36A->C) |
| TH11924 | "                                                                                                                | flgK7263 (-34A->C, -36A->T) |
| TH11925 | "                                                                                                                | flgK7264 (-34A->T, -36A->T) |
| TH11926 | "                                                                                                                | flgK7265 (-55G->T, -56A->G) |
| TH11927 | "                                                                                                                | flgK7266 (-55G->A, -56A->G) |
| TH11928 | "                                                                                                                | flgK7267 (-55G->T, -56A->T) |
| TH11929 | "                                                                                                                | flgK7268 (-55G->A, -56A->T) |
| TH11930 | "                                                                                                                | flgK7269 (-55G->A, -56A->C) |
| TH11931 | "                                                                                                                | flgK7270 (-55G->T, -56A->C) |
| TH11932 | "                                                                                                                | flgK7271 (-57A->T, -59T->C) |
| TH11933 | "                                                                                                                | flgK7272 (-57A->C, -59T->C) |
| TH11934 | "                                                                                                                | flgK7273 (-57A->C, -59T->G) |
| TH11935 | "                                                                                                                | flgK7274 (-57A->G, -59T->G) |
| TH11936 | "                                                                                                                | flgK7275 (-37G->T, -40G->T) |
| TH11937 | "                                                                                                                | flgK7276 (-37G->A, -40G->T) |
| TH11938 | "                                                                                                                | flgK7277 (-37G->T, -40G->C) |
| TH13162 | CRR4107[PflhDC5451::Tn10dTc[Δ25](Tc <sup>S</sup> )<br>ParaB936 ΔaraBAD956::fliA ΔfliA5647::FRT<br>flgK5396::MudJ | flgK6443 (-59 T->C)         |
| TH13163 | "                                                                                                                | flgK6444 (-55 G->A)         |
| TH13164 | "                                                                                                                | flgK6449 (-56 A->G)         |
| TH13165 | "                                                                                                                | flgK6570 (-34 A->C)         |
| TH13166 | "                                                                                                                | flgK6574 (-36 A->T)         |
| TH13167 | "                                                                                                                | flgK6577 (-37 G->T)         |
| TH13168 | "                                                                                                                | flgK6578 (-37 G->A)         |
| TH13169 | "                                                                                                                | flgK6584 (-55 G->T)         |
| TH13170 | "                                                                                                                | flgK6586 (-56 A->T)         |
| TH13171 | "                                                                                                                | flgK6590 (-40 G->C)         |
| TH13172 | "                                                                                                                | flgK6599 (-57 A->C)         |
| TH13173 | "                                                                                                                | flgK6605 (-55 G->C)         |
| TH13174 | "                                                                                                                | flgK6606 (-34 A->T)         |
| TH13175 | "                                                                                                                | flgK7246 (-37G->A, -56A->G) |
| TH13176 | "                                                                                                                | flgK7256 (-34A->T, -55G->T) |
| TH13177 | "                                                                                                                | flgK7258 (-34A->C, -55G->C) |
| TH13178 | "                                                                                                                | flgK7264 (-34A->T, -36A->T) |

**Table S9 (Continued).** Mutant strains used in this paper.

|         |                                                                                                                   |                                   |
|---------|-------------------------------------------------------------------------------------------------------------------|-----------------------------------|
| TH13179 | CRR4107[PflhDC5451::Tn10dTc[Δ25](Tc <sup>S</sup> )]<br>ParaB936 ΔaraBAD956::fliA ΔfliA5647::FRT<br>flgK5396::MudJ | flgK7268 (-55G->A, -56A->T)       |
| TH13180 | "                                                                                                                 | flgK7272 (-57A->C, -59T->C)       |
| TH13181 | "                                                                                                                 | flgK7277 (-37G->T, -40G->C)       |
| TH13261 | "                                                                                                                 | flgK6603 (-58 C->A)               |
| TH13262 | "                                                                                                                 | flgK6604 (-39 C->T)               |
| TH13263 | "                                                                                                                 | flgK7265 (-55G->T, -56A->G)       |
| TH13238 | CRR4107[PflhDC5451::Tn10dTc[Δ25](Tc <sup>S</sup> )]<br>ParaB935 ΔaraBAD956::fliA ΔfliA5647::FRT<br>flgK5396::MudJ | flgK6443 (-59 T->C)               |
| TH13239 | "                                                                                                                 | flgK6444 (-55 G->A)               |
| TH13240 | "                                                                                                                 | flgK6449 (-56 A->G)               |
| TH13241 | "                                                                                                                 | flgK6570 (-34 A->C)               |
| TH13242 | "                                                                                                                 | flgK6574 (-36 A->T)               |
| TH13243 | "                                                                                                                 | flgK6577 (-37 G->T)               |
| TH13244 | "                                                                                                                 | flgK6578 (-37 G->A)               |
| TH13245 | "                                                                                                                 | flgK6584 (-55 G->T)               |
| TH13246 | "                                                                                                                 | flgK6586 (-56 A->T)               |
| TH13247 | "                                                                                                                 | flgK6590 (-40 G->C)               |
| TH13248 | "                                                                                                                 | flgK6599 (-57 A->C)               |
| TH13249 | "                                                                                                                 | flgK6605 (-55 G->C)               |
| TH13250 | "                                                                                                                 | flgK6606 (-34 A->T)               |
| TH13251 | "                                                                                                                 | flgK7246 (-37G->A, -56A->G)       |
| TH13252 | "                                                                                                                 | flgK7256 (-34A->T, -55G->T)       |
| TH13253 | "                                                                                                                 | flgK7258 (-34A->C, -55G->C)       |
| TH13254 | "                                                                                                                 | flgK7264 (-34A->T, -36A->T)       |
| TH13255 | "                                                                                                                 | flgK7268 (-55G->A, -56A->T)       |
| TH13256 | "                                                                                                                 | flgK7272 (-57A->C, -59T->C)       |
| TH13257 | "                                                                                                                 | flgK7277 (-37G->T, -40G->C)       |
| TH13258 | "                                                                                                                 | flgK6603 (-58 C->A)               |
| TH13259 | "                                                                                                                 | flgK6604 (-39 C->T)               |
| TH13260 | "                                                                                                                 | flgK7265 (-55G->T, -56A->G)       |
| TH14059 | "                                                                                                                 | flgK7683 (Δ-50)                   |
| TH14060 | "                                                                                                                 | flgK7684 (Δ-47)                   |
| TH14061 | "                                                                                                                 | flgK7685 (Δ-45)                   |
| TH14062 | "                                                                                                                 | flgK7686 (Δ-43)                   |
| TH14063 | "                                                                                                                 | flgK7687 (Δ-50, Δ-45)             |
| TH14064 | "                                                                                                                 | flgK7688 (Δ-50, Δ-43)             |
| TH14065 | "                                                                                                                 | flgK7689 (Δ-47, Δ-45)             |
| TH14066 | "                                                                                                                 | flgK7690 (ins-52C-51, ins-50G-49) |
| TH14067 | "                                                                                                                 | flgK7691 (ins-50G-49)             |
| TH14068 | "                                                                                                                 | flgK7692 (ins-47T-46)             |
| TH14069 | "                                                                                                                 | flgK7693 (ins-47G-46)             |

**Table S9 (Continued).** Mutant strains used in this paper.

|         |                                                                                                                                             |                                                                                |
|---------|---------------------------------------------------------------------------------------------------------------------------------------------|--------------------------------------------------------------------------------|
| TH14070 | CRR4107[PflhDC5451::Tn10dTc[Δ25](Tc <sup>S</sup> )<br>ParaB935 ΔaraBAD956::fliA ΔfliA5647::FRT<br>flgK5396::MudJ                            | flgK7694 (ins-44C-43)                                                          |
| TH14071 | "                                                                                                                                           | flgK7695 (ins-44A-43)                                                          |
| TH14072 | "                                                                                                                                           | flgK7696 (ins-50T-49, ins-47C-46)                                              |
| TH14073 | "                                                                                                                                           | flgK7697 (ins-50T-49, ins-47A-46)                                              |
| TH14074 | "                                                                                                                                           | flgK7698 (ins-50C-49, Δ-46, ins-44T-43)                                        |
| TH14075 | "                                                                                                                                           | flgK7699 (ins-50A-49, ins-44T-43)                                              |
| TH14076 | "                                                                                                                                           | flgK7700 (ins-46G-45, ins-44T-43)                                              |
| TH14077 | "                                                                                                                                           | flgK7701 (-58C->A, -53C->T, -52C->A)                                           |
| TH14078 | "                                                                                                                                           | flgK7702 (-58C->A, -55G->C, -53C->T,<br>-52C->T, -33A->T)                      |
| TH14079 | "                                                                                                                                           | flgK7703 (-57A->C, -55G->T, -53C->T,<br>-52C->T)                               |
| TH14080 | "                                                                                                                                           | flgK7704 (replaces flgK -25 to -64<br>with tar -24 to -83)                     |
| TH14081 | "                                                                                                                                           | flgK7705 (replaces flgK -25 to -64<br>with motA -160 to -219)                  |
| TH14082 | "                                                                                                                                           | flgK7706 (replaces flgK -25 to -64<br>with cheV -27 to -87)                    |
| TH14083 | "                                                                                                                                           | flgK7707 (replaces flgK -25 to -64<br>with aer -43 to -102)                    |
| TH14088 | "                                                                                                                                           | flgK7711 (Δ-47, Δ-43)                                                          |
| TH14089 | "                                                                                                                                           | flgK7712 (ins-50C-49)                                                          |
| TH14090 | "                                                                                                                                           | flgK7713 (ins-50T-49, ins-44A-43)                                              |
| TH14091 | "                                                                                                                                           | flgK7714 (-58C->A, -54T->A, -53C->T,<br>-52C->A, -41T->C, -35T->A,<br>-33A->T) |
| TH9596  | CRR4107[PflhDC5451::Tn10dTc[Δ25](Tc <sup>S</sup> )<br>ΔaraBAD956::fliA ΔfliA5647::FRT ataA::P22[sieA'-<br>Km6-PfliA(-583 to +1)-lacZYA'-'9] | fliA6482 (-77 G->A)                                                            |
| TH9597  | "                                                                                                                                           | fliA6483 (-40 T->C)                                                            |
| TH9598  | "                                                                                                                                           | fliA6484 (-90 C->T)                                                            |
| TH9599  | "                                                                                                                                           | fliA6485 (-31 C->T)                                                            |
| TH9600  | "                                                                                                                                           | fliA6486 (-27 A->G)                                                            |
| TH9601  | "                                                                                                                                           | fliA6487 (-73 T->C)                                                            |
| TH9602  | "                                                                                                                                           | fliA6488 (-52 T->C)                                                            |
| TH9603  | "                                                                                                                                           | fliA6489 (-33 G->A)                                                            |
| TH9604  | "                                                                                                                                           | fliA6490 (-41 A->G)                                                            |
| TH9605  | "                                                                                                                                           | fliA6491 (-62 T->C)                                                            |
| TH9606  | "                                                                                                                                           | fliA6492 (-71 T->C)                                                            |
| TH10271 | CRR4107[PflhDC5451::Tn10dTc[Δ25](Tc <sup>S</sup> )<br>ΔaraBAD956::fliA ΔfliA5647::FRT fliZ6591::MudJ                                        | fliA6609 (-62 T->C, -90 C->T)                                                  |
| TH10272 | "                                                                                                                                           | fliA6610 (-90 C->T)                                                            |
| TH10380 | "                                                                                                                                           | fliA6634 (-31 C->T)                                                            |
| TH10381 | "                                                                                                                                           | fliA6635 (-73 T->C)                                                            |
| TH10382 | "                                                                                                                                           | fliA6636 (-77 G->A)                                                            |

**Table S9 (Continued).** Mutant strains used in this paper.

|         |                                                                                                       |                                       |
|---------|-------------------------------------------------------------------------------------------------------|---------------------------------------|
| TH10383 | CRR4107[PflhDC5451::Tn10dTc[Δ25](Tc <sup>S</sup> )]<br>ΔaraBAD956::fliA ΔfliA5647::FRT fliZ6591::MudJ | <i>fliA6637</i> (-52 T->C)            |
| TH10384 | "                                                                                                     | <i>fliA6638</i> (-62 T->C)            |
| TH10385 | "                                                                                                     | <i>fliA6639</i> (-71 T->C)            |
| TH10386 | "                                                                                                     | <i>fliA6640</i> (-33 G->A)            |
| TH10387 | "                                                                                                     | <i>fliA6641</i> (-41 A->G)            |
| TH10388 | "                                                                                                     | <i>fliA6642</i> (-27 A->G)            |
| TH10389 | "                                                                                                     | <i>fliA6643</i> (-40 T->C)            |
| TH10390 | "                                                                                                     | <i>fliA6644</i> (-48 G->A)            |
| TH10391 | "                                                                                                     | <i>fliA6645</i> (-43 G->A)            |
| TH10392 | "                                                                                                     | <i>fliA6646</i> (-84 T->C)            |
| TH10393 | "                                                                                                     | <i>fliA6647</i> (-38 A->G)            |
| TH10394 | "                                                                                                     | <i>fliA6648</i> (-74 T->G)            |
| TH10423 | "                                                                                                     | <i>fliA6662</i> (Δ-67T)               |
| TH10424 | "                                                                                                     | <i>fliA6663</i> (-95 A->G)            |
| TH10425 | "                                                                                                     | <i>fliA6664</i> (-77 G->A, -83 T->C)  |
| TH10426 | "                                                                                                     | <i>fliA6665</i> (-96 A->T, -129 G->C) |
| TH10427 | "                                                                                                     | <i>fliA6666</i> (-28 T->C)            |
| TH10428 | "                                                                                                     | <i>fliA6667</i> (-58 A->G)            |
| TH10429 | "                                                                                                     | <i>fliA6668</i> (-49 A->G)            |
| TH10430 | "                                                                                                     | <i>fliA6669</i> (-53 C->T)            |
| TH10431 | "                                                                                                     | <i>fliA6670</i> (-46 A->G)            |
| TH10432 | "                                                                                                     | <i>fliA6671</i> (-82 T->C)            |
| TH10433 | "                                                                                                     | <i>fliA6672</i> (-29 A->T)            |
| TH10434 | "                                                                                                     | <i>fliA6673</i> (-83 T->C)            |
| TH10435 | "                                                                                                     | <i>fliA6674</i> (-78 A->T)            |
| TH10436 | "                                                                                                     | <i>fliA6675</i> (-38 A->T)            |
| TH10437 | "                                                                                                     | <i>fliA6676</i> (-30 G->A)            |
| TH10438 | "                                                                                                     | <i>fliA6677</i> (-94 A->G)            |
| TH10439 | "                                                                                                     | <i>fliA6678</i> (-83 T->G)            |
| TH10440 | "                                                                                                     | <i>fliA6679</i> (-27 A->C)            |
| TH10441 | "                                                                                                     | <i>fliA6680</i> (-92 A->G)            |
| TH10442 | "                                                                                                     | <i>fliA6681</i> (-70 T->A)            |
| TH10443 | "                                                                                                     | <i>fliA6682</i> (-49 A->T)            |
| TH10457 | "                                                                                                     | <i>fliA6684</i> (-103 A->G)           |
| TH10458 | "                                                                                                     | <i>fliA6685</i> (Δ-33->-155)          |
| TH10459 | "                                                                                                     | <i>fliA6686</i> (-39 A->G)            |
| TH10460 | "                                                                                                     | <i>fliA6687</i> (-37 T->C, -102 T->C) |
| TH10461 | "                                                                                                     | <i>fliA6688</i> (-99 G->T)            |
| TH10462 | "                                                                                                     | <i>fliA6689</i> (-79 T->C)            |
| TH10463 | "                                                                                                     | <i>fliA6690</i> (-61 A->T)            |
| TH10464 | "                                                                                                     | <i>fliA6691</i> (-63 A->G)            |
| TH10465 | "                                                                                                     | <i>fliA6692</i> (-41 A->T)            |
| TH10856 | "                                                                                                     | <i>fliA6793</i> (-70 T->G)            |

**Table S9 (Continued).** Mutant strains used in this paper.

|         |                                                                                                       |                             |
|---------|-------------------------------------------------------------------------------------------------------|-----------------------------|
| TH10857 | CRR4107[PflhDC5451::Tn10dTc[Δ25](Tc <sup>S</sup> )]<br>ΔaraBAD956::fliA ΔfliA5647::FRT fliZ6591::MudJ | <i>fliA6794</i> (-71 T->A)  |
| TH10858 | "                                                                                                     | <i>fliA6795</i> (-71 T->G)  |
| TH10859 | "                                                                                                     | <i>fliA6796</i> (-72 A->G)  |
| TH10860 | "                                                                                                     | <i>fliA6797</i> (-72 A->C)  |
| TH10861 | "                                                                                                     | <i>fliA6798</i> (-73 T->G)  |
| TH10862 | "                                                                                                     | <i>fliA6799</i> (-75 C->T)  |
| TH10863 | "                                                                                                     | <i>fliA6800</i> (-75 C->A)  |
| TH10864 | "                                                                                                     | <i>fliA6801</i> (-75 C->G)  |
| TH10865 | "                                                                                                     | <i>fliA6802</i> (-76 C->T)  |
| TH10866 | "                                                                                                     | <i>fliA6803</i> (-76 C->A)  |
| TH10867 | "                                                                                                     | <i>fliA6804</i> (-89 C->T)  |
| TH10868 | "                                                                                                     | <i>fliA6805</i> (-89 C->A)  |
| TH10869 | "                                                                                                     | <i>fliA6806</i> (-90 C->G)  |
| TH10870 | "                                                                                                     | <i>fliA6807</i> (-96 A->G)  |
| TH10871 | "                                                                                                     | <i>fliA6808</i> (-96 A->C)  |
| TH10872 | "                                                                                                     | <i>fliA6809</i> (-100 A->G) |
| TH10873 | "                                                                                                     | <i>fliA6810</i> (-100 A->T) |
| TH10920 | "                                                                                                     | <i>fliA6815</i> (-70 T->C)  |
| TH10921 | "                                                                                                     | <i>fliA6816</i> (-73 T->A)  |
| TH10922 | "                                                                                                     | <i>fliA6817</i> (-76 C->G)  |
| TH10923 | "                                                                                                     | <i>fliA6818</i> (-89 C->G)  |
| TH10924 | "                                                                                                     | <i>fliA6819</i> (-100 A->C) |
| TH11186 | "                                                                                                     | <i>fliA6828</i> (-72 A->T)  |
| TH11187 | "                                                                                                     | <i>fliA6829</i> (-66 T->C)  |
| TH11188 | "                                                                                                     | <i>fliA6830</i> (-66 T->G)  |
| TH11189 | "                                                                                                     | <i>fliA6831</i> (-67 T->A)  |
| TH11190 | "                                                                                                     | <i>fliA6832</i> (-67 T->C)  |
| TH11191 | "                                                                                                     | <i>fliA6833</i> (-68 C->T)  |
| TH11192 | "                                                                                                     | <i>fliA6834</i> (-68 C->G)  |
| TH11193 | "                                                                                                     | <i>fliA6835</i> (-91 A->T)  |
| TH11194 | "                                                                                                     | <i>fliA6836</i> (-91 A->G)  |
| TH11195 | "                                                                                                     | <i>fliA6837</i> (-69 C->T)  |
| TH11196 | "                                                                                                     | <i>fliA6838</i> (-69 C->A)  |
| TH11197 | "                                                                                                     | <i>fliA6839</i> (-69 C->G)  |
| TH11198 | "                                                                                                     | <i>fliA6840</i> (-65 C->A)  |
| TH11199 | "                                                                                                     | <i>fliA6841</i> (-65 C->T)  |
| TH11200 | "                                                                                                     | <i>fliA6842</i> (-64 G->T)  |
| TH11201 | "                                                                                                     | <i>fliA6843</i> (-64 G->A)  |
| TH11202 | "                                                                                                     | <i>fliA6844</i> (-63 A->C)  |
| TH11203 | "                                                                                                     | <i>fliA6845</i> (-62 T->A)  |
| TH11204 | "                                                                                                     | <i>fliA6846</i> (-62 T->G)  |
| TH11205 | "                                                                                                     | <i>fliA6847</i> (-61 A->C)  |
| TH11206 | "                                                                                                     | <i>fliA6848</i> (-60 G->T)  |

**Table S9 (Continued).** Mutant strains used in this paper.

|         |                                                                                                       |                                      |
|---------|-------------------------------------------------------------------------------------------------------|--------------------------------------|
| TH11207 | CRR4107[PflhDC5451::Tn10dTc[Δ25](Tc <sup>S</sup> )]<br>ΔaraBAD956::fliA ΔfliA5647::FRT fliZ6591::MudJ | <i>fliA6849</i> (-60 G->A)           |
| TH11208 | "                                                                                                     | <i>fliA6850</i> (-60 G->C)           |
| TH11209 | "                                                                                                     | <i>fliA6851</i> (-74 T->A)           |
| TH11210 | "                                                                                                     | <i>fliA6852</i> (-61 A->G)           |
| TH11243 | "                                                                                                     | <i>fliA7034</i> (-63 A->T)           |
| TH11421 | "                                                                                                     | <i>fliA7074</i> (-96 A->T)           |
| TH11422 | "                                                                                                     | <i>fliA7075</i> (-91 A->C)           |
| TH11423 | "                                                                                                     | <i>fliA7076</i> (-68 C->A)           |
| TH11424 | "                                                                                                     | <i>fliA7077</i> (-67 T->G)           |
| TH11425 | "                                                                                                     | <i>fliA7078</i> (-66 T->A)           |
| TH11426 | "                                                                                                     | <i>fliA7079</i> (-65 C->G)           |
| TH11427 | "                                                                                                     | <i>fliA7080</i> (-64 G->C)           |
| TH11493 | "                                                                                                     | <i>fliA7121</i> (-74 T->C)           |
| TH11496 | "                                                                                                     | <i>fliA7122</i> (-90 C->A)           |
| TH11668 | "                                                                                                     | <i>fliA7160</i> (-81 T->G)           |
| TH11669 | "                                                                                                     | <i>fliA7161</i> (-81 T->A)           |
| TH11670 | "                                                                                                     | <i>fliA7162</i> (-104 C->G)          |
| TH11671 | "                                                                                                     | <i>fliA7163</i> (-104 C->A)          |
| TH11672 | "                                                                                                     | <i>fliA7164</i> (-105 A->T)          |
| TH11673 | "                                                                                                     | <i>fliA7165</i> (-105 A->G)          |
| TH11674 | "                                                                                                     | <i>fliA7166</i> (-82 T->A)           |
| TH11675 | "                                                                                                     | <i>fliA7167</i> (-82 T->G)           |
| TH11676 | "                                                                                                     | <i>fliA7168</i> (-84 T->A)           |
| TH11677 | "                                                                                                     | <i>fliA7169</i> (-84 T->G)           |
| TH11678 | "                                                                                                     | <i>fliA7170</i> (-103 A->T)          |
| TH11679 | "                                                                                                     | <i>fliA7171</i> (-83 T->A)           |
| TH11695 | "                                                                                                     | <i>fliA7172</i> (-65 C->A, -91 A->G) |
| TH11696 | "                                                                                                     | <i>fliA7173</i> (-65 C->A, -91 A->C) |
| TH11697 | "                                                                                                     | <i>fliA7174</i> (-65 C->A, -91 A->T) |
| TH11698 | "                                                                                                     | <i>fliA7175</i> (-65 C->T, -91 A->G) |
| TH11699 | "                                                                                                     | <i>fliA7176</i> (-65 C->T, -91 A->C) |
| TH11700 | "                                                                                                     | <i>fliA7177</i> (-65 C->G, -91 A->G) |
| TH11701 | "                                                                                                     | <i>fliA7178</i> (-65 C->G, -91 A->C) |
| TH11702 | "                                                                                                     | <i>fliA7179</i> (-63 A->T, -65 C->T) |
| TH11703 | "                                                                                                     | <i>fliA7180</i> (-63 A->T, -65 C->G) |
| TH11704 | "                                                                                                     | <i>fliA7181</i> (-64 G->A, -72 A->C) |
| TH11705 | "                                                                                                     | <i>fliA7182</i> (-64 G->C, -72 A->C) |
| TH11706 | "                                                                                                     | <i>fliA7183</i> (-64 G->A, -72 A->G) |
| TH11707 | "                                                                                                     | <i>fliA7184</i> (-64 G->C, -72 A->G) |
| TH11708 | "                                                                                                     | <i>fliA7185</i> (-64 G->T, -72 A->G) |
| TH11709 | "                                                                                                     | <i>fliA7186</i> (-71 T->C, -74 T->A) |
| TH11710 | "                                                                                                     | <i>fliA7187</i> (-71 T->G, -74 T->G) |
| TH11711 | "                                                                                                     | <i>fliA7188</i> (-61 A->T, -64 G->T) |

**Table S9 (Continued).** Mutant strains used in this paper.

|         |                                                                                                       |                                                             |
|---------|-------------------------------------------------------------------------------------------------------|-------------------------------------------------------------|
| TH11712 | CRR4107[PflhDC5451::Tn10dTc[Δ25](Tc <sup>S</sup> )]<br>ΔaraBAD956::fliA ΔfliA5647::FRT fliZ6591::MudJ | <i>fliA7189</i> (-61 A->T, -64 G->A)                        |
| TH11713 | "                                                                                                     | <i>fliA7190</i> (-61 A->T, -70 T->C)                        |
| TH11714 | "                                                                                                     | <i>fliA7191</i> (-61 A->T, -70 T->G)                        |
| TH11715 | "                                                                                                     | <i>fliA7192</i> (-69 C->T, -96 A->T)                        |
| TH11716 | "                                                                                                     | <i>fliA7193</i> (-69 C->T, -96 A->G)                        |
| TH11717 | "                                                                                                     | <i>fliA7194</i> (-69 C->A, -96 A->G)                        |
| TH11718 | "                                                                                                     | <i>fliA7195</i> (-69 C->G, -96 A->T)                        |
| TH11719 | "                                                                                                     | <i>fliA7196</i> (-69 C->G, -96 A->G)                        |
| TH11720 | "                                                                                                     | <i>fliA7197</i> (-76 C->T, -100 A->G)                       |
| TH11721 | "                                                                                                     | <i>fliA7198</i> (-76 C->T, -100 A->T)                       |
| TH11722 | "                                                                                                     | <i>fliA7199</i> (-76 C->A, -100 A->G)                       |
| TH11723 | "                                                                                                     | <i>fliA7200</i> (-76 C->G, -100 A->G)                       |
| TH11724 | "                                                                                                     | <i>fliA7201</i> (-76 C->G, -100 A->T)                       |
| TH11725 | "                                                                                                     | <i>fliA7202</i> (-103 A->C)                                 |
| TH11730 | "                                                                                                     | <i>fliA7203</i> (-71 T->A, -74 T->G)                        |
| TH11731 | "                                                                                                     | <i>fliA7204</i> (-69 C->A, -96 A->T)                        |
| TH11788 | "                                                                                                     | <i>fliA7214</i> (-105 A->C)                                 |
| TH11789 | "                                                                                                     | <i>fliA7215</i> (-104 C->T)                                 |
| TH11790 | "                                                                                                     | <i>fliA7216</i> (-81 T->C)                                  |
| TH11791 | "                                                                                                     | <i>fliA7217</i> (Δ-86T)                                     |
| TH11792 | "                                                                                                     | <i>fliA7218</i> (Δ-85C)                                     |
| TH11793 | "                                                                                                     | <i>fliA7219</i> (Δ-84T)                                     |
| TH11794 | "                                                                                                     | <i>fliA7220</i> (Δ-80A)                                     |
| TH11795 | "                                                                                                     | <i>fliA7221</i> (Δ-79T)                                     |
| TH11796 | "                                                                                                     | <i>fliA7222</i> (ins-86G-85)                                |
| TH11797 | "                                                                                                     | <i>fliA7223</i> (ins-86A-85)                                |
| TH11798 | "                                                                                                     | <i>fliA7224</i> (ins-82G-81)                                |
| TH11807 | "                                                                                                     | <i>fliA7225</i> (ins-82C-81)                                |
| TH11947 | "                                                                                                     | <i>fliA7278</i> (Δ-85C, Δ-86T)                              |
| TH11948 | "                                                                                                     | <i>fliA7279</i> (Δ-79T, Δ-86T)                              |
| TH11949 | "                                                                                                     | <i>fliA7280</i> (Δ-80A, Δ-85C)                              |
| TH11950 | "                                                                                                     | <i>fliA7281</i> (Δ-79T, Δ-80A)                              |
| TH11951 | "                                                                                                     | <i>fliA7282</i> (ins-82T-81)                                |
| TH11952 | "                                                                                                     | <i>fliA7283</i> (-84 T->A, -83 T->A,<br>-82 T->A, -81 T->A) |
| TH12349 | "                                                                                                     | <i>fliA7332</i> (ins -82 ACGCATTTTGC<br>-81)                |
| TH12350 | "                                                                                                     | <i>fliA7333</i> (ins -82 CGCATTTTGC<br>-81)                 |
| TH12352 | "                                                                                                     | <i>fliA7335</i> (ins -86 AGGTTTTTTAT<br>-85)                |
| TH12353 | "                                                                                                     | <i>fliA7336</i> (ins -86 GGTTTTTTAT -85)                    |
| TH12496 | "                                                                                                     | <i>fliA7405</i> (-66 T->C, -73 T->A)                        |
| TH12536 | "                                                                                                     | <i>fliA7447</i> (-33 G->A, -121 A->G)                       |



**Table S9 (Continued).** Mutant strains used in this paper.

|        |                                                                                                       |                      |
|--------|-------------------------------------------------------------------------------------------------------|----------------------|
| TH9314 | CRR4108[PflhDC5451::Tn10dTc[Δ25](Tc <sup>S</sup> )]<br>ΔaraBAD943::fliA ΔfliA5647::FRT fliS5480::MudK | fliD6455 (-44 G->A)  |
| TH9316 | "                                                                                                     | fliD6456 (-107 A->G) |
| TH9317 | "                                                                                                     | fliD6457 (-96 T->C)  |
| TH9318 | "                                                                                                     | fliD6458 (-90 G->A)  |
| TH9319 | "                                                                                                     | fliD6459 (-34 T->C)  |
| TH9320 | "                                                                                                     | fliD6460 (-28 A->G)  |
| TH9322 | "                                                                                                     | fliD6462 (-23 T->A)  |
| TH9323 | "                                                                                                     | fliD6463 (-41 A->G)  |
| TH9324 | "                                                                                                     | fliD6464 (-26 T->C)  |
| TH9326 | "                                                                                                     | fliD6465 (-17 T->C)  |
| TH9327 | "                                                                                                     | fliD6466 (-42 T->C)  |
| TH9329 | "                                                                                                     | fliD6468 (-48 T->C)  |
| TH9454 | CRR4107[PflhDC5451::Tn10dTc[Δ25](Tc <sup>S</sup> )]<br>ΔaraBAD956::fliA ΔfliA5647::FRT fliS5480::MudK | fliD6455 (-44 G->A)  |
| TH9456 | "                                                                                                     | fliD6456 (-107 A->G) |
| TH9457 | "                                                                                                     | fliD6457 (-96 T->C)  |
| TH9458 | "                                                                                                     | fliD6458 (-90 G->A)  |
| TH9459 | "                                                                                                     | fliD6459 (-34 T->C)  |
| TH9460 | "                                                                                                     | fliD6460 (-28 A->G)  |
| TH9462 | "                                                                                                     | fliD6462 (-23 T->A)  |
| TH9463 | "                                                                                                     | fliD6463 (-41 A->G)  |
| TH9464 | "                                                                                                     | fliD6464 (-26 T->C)  |
| TH9466 | "                                                                                                     | fliD6465 (-17 T->C)  |
| TH9467 | "                                                                                                     | fliD6466 (-42 T->C)  |
| TH9469 | "                                                                                                     | fliD6468 (-48 T->C)  |
| TH9586 | "                                                                                                     | fliD6474 (-62 C->T)  |
| TH9587 | "                                                                                                     | fliD6475 (-64 A->C)  |
| TH9588 | "                                                                                                     | fliD6476 (-95 T->C)  |
| TH9589 | "                                                                                                     | fliD6477 (-40 A->G)  |
| TH9590 | "                                                                                                     | fliD6478 (-120 A->G) |
| TH9591 | "                                                                                                     | fliD6479 (-102 T->A) |
| TH9592 | "                                                                                                     | fliD6480 (-121 G->T) |
| TH9593 | "                                                                                                     | fliD6481 (-23 T->C)  |
| TH9300 | CRR4107[PflhDC5451::Tn10dTc[Δ25](Tc <sup>S</sup> )]<br>ΔaraBAD956::fliA ΔfliA5647::FRT flgM5222::MudJ | flgM6441 (-65 C->T)  |

**Table S10.** Activities and PCR details for mutants constructed in this study.

| Strain  | PCR           |               |          | Mutation      | Class 2  |     | Class 3  |     |
|---------|---------------|---------------|----------|---------------|----------|-----|----------|-----|
|         | Primer #1     | Primer #2     | Template |               | Activity | SD  | Activity | SD  |
| TH9301  | flgK-105/-86F | flgK+42/+23R  | TH437    | -54 T->A      |          |     |          |     |
| TH9302  | flgK-105/-86F | flgK+42/+23R  | TH437    | -59 T->C      |          |     |          |     |
| TH9303  | flgK-105/-86F | flgK+42/+23R  | TH437    | -55 G->A      |          |     |          |     |
| TH9304  | flgK-105/-86F | flgK+42/+23R  | TH437    | -36 A->G      |          |     |          |     |
| TH9305  | flgK-105/-86F | flgK+42/+23R  | TH437    | -33 A->G      |          |     |          |     |
| TH9306  | flgK-105/-86F | flgK+42/+23R  | TH437    | -34 A->G      |          |     |          |     |
| TH9307  | flgK-105/-86F | flgK+42/+23R  | TH437    | -41 T->C      |          |     |          |     |
| TH9308  | flgK-105/-86F | flgK+42/+23R  | TH437    | -56 A->G      |          |     |          |     |
| TH9309  | flgK-105/-86F | flgK+42/+23R  | TH437    | -64 A->G      |          |     |          |     |
| TH9311  | flgK-105/-86F | flgK+42/+23R  | TH437    | -59 T->A      |          |     |          |     |
| TH9312  | flgK-105/-86F | flgK+42/+23R  | TH437    | $\Delta$ -34A |          |     |          |     |
| TH9313  | flgK-105/-86F | flgK+42/+23R  | TH437    | -57 A->G      |          |     |          |     |
| TH9441  |               |               |          | -54 T->A      | 91       | 4.0 | 79       | 4.0 |
| TH9442  |               |               |          | -59 T->C      | 95       | 4.3 | 31       | 3.0 |
| TH9443  |               |               |          | -55 G->A      | 93       | 7.9 | 82       | 11  |
| TH9444  |               |               |          | -36 A->G      | 95       | 4.7 | 3.5      | 0.3 |
| TH9445  |               |               |          | -33 A->G      | 87       | 5.7 | 89       | 8.5 |
| TH9446  |               |               |          | -34 A->G      | 94       | 7.9 | 79       | 6.8 |
| TH9447  |               |               |          | -41 T->C      | 89       | 2.9 | 103      | 7.8 |
| TH9448  |               |               |          | -56 A->G      | 101      | 8.9 | 79       | 13  |
| TH9449  |               |               |          | -64 A->G      | 91       | 4.1 | 107      | 8.1 |
| TH9451  |               |               |          | -59 T->A      | 99       | 0.7 | 70       | 1.3 |
| TH9452  |               |               |          | $\Delta$ -34A | 90       | 4.3 | 101      | 5.8 |
| TH9453  |               |               |          | -57 A->G      | 109      | 6.5 | 60       | 3.1 |
| TH9579  | flgK-105/-86F | flgK+42/+23R  | TH437    | -40 G->A      | 102      | 3.9 | 100      | 7.2 |
| TH9580  | flgK-105/-86F | flgK+42/+23R  | TH437    | -61 G->C      | 28       | 0.7 | 108      | 10  |
| TH9581  | flgK-105/-86F | flgK+42/+23R  | TH437    | -58 C->T      | 95       | 5.0 | 105      | 8.4 |
| TH9582  | flgK-105/-86F | flgK+42/+23R  | TH437    | -1 C->T       | 103      | 2.2 | 86       | 3.1 |
| TH9583  | flgK-105/-86F | flgK+42/+23R  | TH437    | $\Delta$ -58C | 104      | 3.6 | 22       | 1.7 |
| TH9975  | flgK-52       | flgK-105/-86F | TH437    | -52 C->T      |          |     | 98       | 3.5 |
| TH9976  | flgK-53       | flgK-105/-86F | TH437    | -53 C->T      |          |     | 101      | 2.9 |
| TH9977  | flgK-53       | flgK-105/-86F | TH437    | -53 C->A      |          |     | 99       | 4.4 |
| TH10001 | flgK-34       | flgK-105/-86F | TH437    | -34 A->C      |          |     | 44       | 1.2 |
| TH10002 | flgK-35       | flgK-105/-86F | TH437    | -35 T->A      |          |     | 88       | 2.2 |
| TH10003 | flgK-35       | flgK-105/-86F | TH437    | -35 T->G      |          |     | 48       | 1.2 |
| TH10004 | flgK-35       | flgK-105/-86F | TH437    | -35 T->C      |          |     | 75       | 4.2 |
| TH10005 | flgK-36       | flgK-105/-86F | TH437    | -36 A->T      |          |     | 71       | 3.7 |
| TH10006 | flgK-36       | flgK-105/-86F | TH437    | -36 A->C      |          |     | 9.9      | 0.8 |
| TH10007 | flgK-37       | flgK-105/-86F | TH437    | -37 G->C      |          |     | 1.9      | 0.1 |
| TH10008 | flgK-37       | flgK-105/-86F | TH437    | -37 G->T      |          |     | 4.2      | 0.2 |
| TH10009 | flgK-37       | flgK-105/-86F | TH437    | -37 G->A      |          |     | 12       | 0.1 |
| TH10010 | flgK-38       | flgK-105/-86F | TH437    | -38 C->A      |          |     | 2.9      | 0.2 |

**Table S10 (continued).** Activities and PCR details for mutants constructed in this study.

| Strain  | PCR       |               |          | Mutation         | Class 2  |    | Class 3  |      |
|---------|-----------|---------------|----------|------------------|----------|----|----------|------|
|         | Primer #1 | Primer #2     | Template |                  | Activity | SD | Activity | SD   |
| TH10011 | flgK-39   | flgK-105/-86F | TH437    | -39 C->G         |          |    | 53       | 2.9  |
| TH10012 | flgK-39   | flgK-105/-86F | TH437    | -39 C->A         |          |    | 92       | 8.2  |
| TH10013 | flgK-40   | flgK-105/-86F | TH437    | -40 G->T         |          |    | 85       | 6.8  |
| TH10014 | flgK-54   | flgK-105/-86F | TH437    | -54 T->G         |          |    | 95       | 5.3  |
| TH10015 | flgK-55   | flgK-105/-86F | TH437    | -55 G->T         |          |    | 83       | 4.7  |
| TH10016 | flgK-56   | flgK-105/-86F | TH437    | -56 A->C         |          |    | 76       | 5.2  |
| TH10017 | flgK-56   | flgK-105/-86F | TH437    | -56 A->T         |          |    | 86       | 3.7  |
| TH10018 | flgK-57   | flgK-105/-86F | TH437    | -57 A->T         |          |    | 55       | 4.7  |
| TH10019 | flgK-58   | flgK-105/-86F | TH437    | -58 C->G         |          |    | 95       | 6.6  |
| TH10020 | flgK-59   | flgK-105/-86F | TH437    | -59 T->G         |          |    | 56       | 3.9  |
| TH10021 | flgK-40   | flgK-105/-86F | TH437    | -40 G->C         |          |    | 50       | 3.5  |
| TH10091 | flgK-38M  | flgK-105/-86F | TH437    | -38 C->T         |          |    | 1.9      | 0.2  |
| TH10092 | flgK-38M  | flgK-105/-86F | TH437    | -38 C->G         |          |    | 2.0      | 0.1  |
| TH10093 | flgK-54G  | flgK-105/-86F | TH437    | -54 T->C         |          |    | 101      | 0.7  |
| TH10094 | flgK-57   | flgK-105/-86F | TH437    | -57 A->C         |          |    | 69       | 0.9  |
| TH10114 | flgK-58T  | flgK-105/-86F | TH437    | -58 C->A         |          |    | 111      | 3.2  |
| TH10115 | flgK-39A  | flgK-105/-86F | TH437    | -39 C->T         |          |    | 94       | 6.8  |
| TH10116 | flgK-55G  | flgK-105/-86F | TH437    | -55 G->C         |          |    | 89       | 5.6  |
| TH10127 | flgK-34A  | flgK-105/-86F | TH437    | -34 A->T         |          |    | 77       | 5.9  |
| TH11781 | flgK-33C  | flgK-105/-86F | TH437    | -33 A->C         |          |    | 100      | 3.1  |
| TH11782 | flgK-33T  | flgK-105/-86F | TH437    | -33 A->T         |          |    | 100      | 3.3  |
| TH11783 | flgK-41A  | flgK-105/-86F | TH437    | -41 T->A         |          |    | 104      | 5.8  |
| TH11784 | flgK-41G  | flgK-105/-86F | TH437    | -41 T->G         |          |    | 106      | 4.7  |
| TH11785 | flgK-52A  | flgK-105/-86F | TH437    | -52 C->A         |          |    | 110      | 3.8  |
| TH11786 | flgK-52G  | flgK-105/-86F | TH437    | -52 C->G         |          |    | 109      | 1.5  |
| TH11787 | flgK-53G  | flgK-105/-86F | TH437    | -53 C->G         |          |    | 104      | 2.8  |
| TH11899 | flgK-35   | flgK-105/-86F | TH10018  | -35T->A, -57A->T |          |    | 15       | 0.5  |
| TH11900 | flgK-35   | flgK-105/-86F | TH10018  | -35T->G, -57A->T |          |    | 5.1      | 0.1  |
| TH11901 | flgK-35   | flgK-105/-86F | TH9453   | -35T->A, -57A->G |          |    | 14       | 0.4  |
| TH11902 | flgK-35   | flgK-105/-86F | TH9453   | -35T->G, -57A->G |          |    | 4.6      | 0.2  |
| TH11903 | flgK-35   | flgK-105/-86F | TH10094  | -35T->A, -57A->C |          |    | 25       | 1.3  |
| TH11904 | flgK-35   | flgK-105/-86F | TH10094  | -35T->G, -57A->C |          |    | 7.9      | 0.7  |
| TH11905 | flgK-37   | flgK-105/-86F | TH10017  | -37G->A, -56A->T |          |    | 4.0      | 0.02 |
| TH11906 | flgK-37   | flgK-105/-86F | TH10017  | -37G->C, -56A->T |          |    | 2.0      | 0.05 |
| TH11907 | flgK-37   | flgK-105/-86F | TH9448   | -37G->A, -56A->G |          |    | 3.2      | 0.1  |
| TH11908 | flgK-37   | flgK-105/-86F | TH9448   | -37G->C, -56A->G |          |    | 2.1      | 0.02 |
| TH11909 | flgK-37   | flgK-105/-86F | TH10016  | -37G->T, -56A->C |          |    | 2.0      | 0.1  |
| TH11910 | flgK-37   | flgK-105/-86F | TH10016  | -37G->A, -56A->C |          |    | 2.9      | 0.02 |
| TH11911 | flgK-40   | flgK-105/-86F | TH10020  | -40G->T, -59T->G |          |    | 17       | 0.6  |
| TH11912 | flgK-40   | flgK-105/-86F | TH10020  | -40G->C, -59T->G |          |    | 5.7      | 0.7  |
| TH11913 | flgK-40   | flgK-105/-86F | TH9442   | -40G->T, -59T->C |          |    | 5.5      | 0.2  |
| TH11914 | flgK-40   | flgK-105/-86F | TH9442   | -40G->C, -59T->C |          |    | 3.0      | 0.3  |

**Table S10 (continued).** Activities and PCR details for mutants constructed in this study.

| Strain  | PCR                     |               |          | Mutation                                | Class 2  |    | Class 3  |      |
|---------|-------------------------|---------------|----------|-----------------------------------------|----------|----|----------|------|
|         | Primer #1               | Primer #2     | Template |                                         | Activity | SD | Activity | SD   |
| TH11915 | flgK-34                 | flgK-105/-86F | TH9443   | -34A->C, -55G->A                        |          |    | 15       | 1.0  |
| TH11916 | flgK-34                 | flgK-105/-86F | TH10015  | -34A->C, -55G->T                        |          |    | 18       | 0.4  |
| TH11917 | flgK-34                 | flgK-105/-86F | TH10015  | -34A->T, -55G->T                        |          |    | 42       | 4.1  |
| TH11918 | flgK-34                 | flgK-105/-86F | TH10116  | -34A->T, -55G->C                        |          |    | 48       | 0.3  |
| TH11919 | flgK-34                 | flgK-105/-86F | TH10116  | -34A->C, -55G->C                        |          |    | 19       | 1.3  |
| TH11920 | flgK-34B-36G            | flgK-105/-86F | TH437    | -34A->G, -36A->G                        |          |    | 1.5      | 0.1  |
| TH11921 | flgK-34B-36G            | flgK-105/-86F | TH437    | -34A->T, -36A->G                        |          |    | 2.0      | 0.1  |
| TH11922 | flgK-34B-36C            | flgK-105/-86F | TH437    | -34A->G, -36A->C                        |          |    | 1.8      | 0.1  |
| TH11923 | flgK-34B-36C            | flgK-105/-86F | TH437    | -34A->T, -36A->C                        |          |    | 3.4      | 0.1  |
| TH11924 | flgK-34B-36T            | flgK-105/-86F | TH437    | -34A->C, -36A->T                        |          |    | 7.7      | 0.2  |
| TH11925 | flgK-34B-36T            | flgK-105/-86F | TH437    | -34A->T, -36A->T                        |          |    | 27       | 1.7  |
| TH11926 | flgK-55H-56G            | flgK-105/-86F | TH437    | -55G->T, -56A->G                        |          |    | 70       | 12   |
| TH11927 | flgK-55H-56G            | flgK-105/-86F | TH437    | -55G->A, -56A->G                        |          |    | 78       | 0.3  |
| TH11928 | flgK-55H-56T            | flgK-105/-86F | TH437    | -55G->T, -56A->T                        |          |    | 66       | 3.0  |
| TH11929 | flgK-55H-56T            | flgK-105/-86F | TH437    | -55G->A, -56A->T                        |          |    | 81       | 3.2  |
| TH11930 | flgK-55H-56C            | flgK-105/-86F | TH437    | -55G->A, -56A->C                        |          |    | 82       | 1.1  |
| TH11931 | flgK-55H-56C            | flgK-105/-86F | TH437    | -55G->T, -56A->C                        |          |    | 51       | 1.0  |
| TH11932 | flgK-57B-59C            | flgK-105/-86F | TH437    | -57A->T, -59T->C                        |          |    | 7.9      | 0.3  |
| TH11933 | flgK-57B-59C            | flgK-105/-86F | TH437    | -57A->C, -59T->C                        |          |    | 10       | 0.9  |
| TH11934 | flgK-57B-59G            | flgK-105/-86F | TH437    | -57A->C, -59T->G                        |          |    | 12       | 0.5  |
| TH11935 | flgK-57B-59G            | flgK-105/-86F | TH437    | -57A->G, -59T->G                        |          |    | 17       | 0.2  |
| TH11936 | flgK-37H-40T            | flgK-105/-86F | TH437    | -37G->T, -40G->T                        |          |    | 2.2      | 0.2  |
| TH11937 | flgK-37H-40T            | flgK-105/-86F | TH437    | -37G->A, -40G->T                        |          |    | 1.8      | 0.1  |
| TH11938 | flgK-37W-40C            | flgK-105/-86F | TH437    | -37G->T, -40G->C                        |          |    | 1.9      | 0.04 |
| TH14059 | flgKdel-50              | flgK-105/-86F | TH437    | $\Delta$ -50                            |          |    | 10       | 0.67 |
| TH14060 | flgKdel-47              | flgK-105/-86F | TH437    | $\Delta$ -47                            |          |    | 18       | 0.57 |
| TH14061 | flgKdel-45              | flgK-105/-86F | TH437    | $\Delta$ -45                            |          |    | 21       | 0.76 |
| TH14062 | flgKdel-43              | flgK-105/-86F | TH437    | $\Delta$ -43                            |          |    | 17       | 0.72 |
| TH14063 | flgKdel-50,-45          | flgK-105/-86F | TH437    | $\Delta$ -50, $\Delta$ -45              |          |    | 5.7      | 0.04 |
| TH14064 | flgKdel-50,-43          | flgK-105/-86F | TH437    | $\Delta$ -50, $\Delta$ -43              |          |    | 5.3      | 0.18 |
| TH14065 | flgKdel-47,-45          | flgK-105/-86F | TH437    | $\Delta$ -47, $\Delta$ -45              |          |    | 5.7      | 0.21 |
| TH14066 | flgK-50N-49             | flgK-105/-86F | TH437    | ins-52C-51, ins-50G-49                  |          |    | 11       | 0.12 |
| TH14067 | flgK-50N-49             | flgK-105/-86F | TH437    | ins-50G-49                              |          |    | 89       | 6.9  |
| TH14068 | flgK-47N-46             | flgK-105/-86F | TH437    | ins-47T-46                              |          |    | 82       | 2.2  |
| TH14069 | flgK-47N-46             | flgK-105/-86F | TH437    | ins-47G-46                              |          |    | 86       | 2.0  |
| TH14070 | flgK-44N-43             | flgK-105/-86F | TH437    | ins-44C-43                              |          |    | 82       | 3.7  |
| TH14071 | flgK-44N-43             | flgK-105/-86F | TH437    | ins-44A-43                              |          |    | 84       | 5.4  |
| TH14072 | flgK-50N-49,<br>-47N-46 | flgK-105/-86F | TH437    | ins-50T-49,<br>ins-47C-46               |          |    | 8.2      | 0.63 |
| TH14073 | flgK-50N-49,<br>-47N-46 | flgK-105/-86F | TH437    | ins-50T-49,<br>ins-47A-46               |          |    | 7.4      | 0.33 |
| TH14074 | flgK-50N-49,<br>-44N-43 | flgK-105/-86F | TH437    | ins-50C-49, $\Delta$ -46,<br>ins-44T-43 |          |    | 89       | 5.9  |

**Table S10 (continued).** Activities and PCR details for mutants constructed in this study.

| Strain  | PCR                     |               |          | Mutation                                                            | Class 2  |     | Class 3  |      |
|---------|-------------------------|---------------|----------|---------------------------------------------------------------------|----------|-----|----------|------|
|         | Primer #1               | Primer #2     | Template |                                                                     | Activity | SD  | Activity | SD   |
| TH14075 | flgK-50N-49,<br>-44N-43 | flgK-105/-86F | TH437    | ins-50A-49,<br>ins-44T-43                                           |          |     | 15       | 0.19 |
| TH14076 | flgK-47N-46,<br>-44N-43 | flgK-105/-86F | TH437    | ins-46G-45,<br>ins-44T-43                                           |          |     | 12       | 0.55 |
| TH14077 | flgKtaroct              | flgK-105/-86F | TH10114  | -58C->A, -53C->T, -52C->A                                           |          |     | 126      | 7.6  |
| TH14078 | flgKmotAoct             | flgK-105/-86F | TH10114  | -58C->A, -55G->C, -53C->T,<br>-52C->T, -33A->T                      |          |     | 158      | 5.6  |
| TH14079 | flgKcheVoct             | flgK-105/-86F | TH10094  | -57A->C, -55G->T,<br>-53C->T, -52C->T                               |          |     | 40       | 1.3  |
| TH14080 | flgKtarUp               | flgKtarDown   | TH8087   | replaces <i>flgK</i> -25 to -64<br>with <i>tar</i> -24 to -83       |          |     | 114      | 3.1  |
| TH14081 | flgKmotAUp              | flgKmotADown  | TH8087   | replaces <i>flgK</i> -25 to -64<br>with <i>motA</i> -160 to -219    |          |     | 107      | 1.4  |
| TH14082 | flgKcheVUp              | flgKcheVDown  | TH8087   | replaces <i>flgK</i> -25 to -64<br>with <i>cheV</i> -27 to -87      |          |     | 60       | 5.4  |
| TH14083 | flgKaerUp               | flgKaerDown   | TH8087   | replaces <i>flgK</i> -25 to -64<br>with <i>aer</i> -43 to -102      |          |     | 66       | 4.5  |
| TH14088 | flgKdel-47-43           | flgK-105/-86F | TH437    | Δ-47, Δ-43                                                          |          |     | 5.7      | 0.25 |
| TH14089 | flgK-50N-49             | flgK-105/-86F | TH437    | ins-50C-49                                                          |          |     | 87       | 3.8  |
| TH14090 | flgK-50N-49,<br>-44N-43 | flgK-105/-86F | TH437    | ins-50T-49,<br>ins-44A-43                                           |          |     | 8.7      | 0.55 |
| TH14091 | flgKaeroct              | flgK-105/-86F | TH10114  | -58C->A, -54T->A, -53C->T,<br>-52C->A, -41T->C, -35T->A,<br>-33A->T |          |     | 25       | 0.44 |
| TH9596  | fliA-156/-137           | fliA+5/-15    | TH437    | -77 G->A                                                            |          |     |          |      |
| TH9597  | fliA-156/-137           | fliA+5/-15    | TH437    | -40 T->C                                                            |          |     |          |      |
| TH9598  | fliA-156/-137           | fliA+5/-15    | TH437    | -90 C->T                                                            |          |     |          |      |
| TH9599  | fliA-156/-137           | fliA+5/-15    | TH437    | -31 C->T                                                            |          |     |          |      |
| TH9600  | fliA-156/-137           | fliA+5/-15    | TH437    | -27 A->G                                                            |          |     |          |      |
| TH9601  | fliA-156/-137           | fliA+5/-15    | TH437    | -73 T->C                                                            |          |     |          |      |
| TH9602  | fliA-156/-137           | fliA+5/-15    | TH437    | -52 T->C                                                            |          |     |          |      |
| TH9603  | fliA-156/-137           | fliA+5/-15    | TH437    | -33 G->A                                                            |          |     |          |      |
| TH9604  | fliA-156/-137           | fliA+5/-15    | TH437    | -41 A->G                                                            |          |     |          |      |
| TH9605  | fliA-156/-137           | fliA+5/-15    | TH437    | -62 T->C                                                            |          |     |          |      |
| TH9606  | fliA-156/-137           | fliA+5/-15    | TH437    | -71 T->C                                                            |          |     |          |      |
| TH10271 | fliA-156/-137           | fliA+5/-15    | TH9967   | -62 T->C, -90 C->T                                                  | 6.6      | 0.3 |          |      |
| TH10272 | fliA-156/-137           | fliA+5/-15    | TH9967   | -90 C->T                                                            | 39       | 2.1 | 112      | 3.7  |
| TH10380 | fliA-156/-137           | fliA+5/-15    | TH9599   | -31 C->T                                                            | 109      | 1.6 | 1.1      | 0.1  |
| TH10381 | fliA-156/-137           | fliA+5/-15    | TH9601   | -73 T->C                                                            | 3.8      | 0.1 | 107      | 8.5  |
| TH10382 | fliA-156/-137           | fliA+5/-15    | TH9596   | -77 G->A                                                            | 52       | 3.6 | 113      | 3.7  |
| TH10383 | fliA-156/-137           | fliA+5/-15    | TH9602   | -52 T->C                                                            | 104      | 5.9 | 28       | 0.6  |
| TH10384 | fliA-156/-137           | fliA+5/-15    | TH9605   | -62 T->C                                                            | 12       | 0.6 | 117      | 12   |
| TH10385 | fliA-156/-137           | fliA+5/-15    | TH9606   | -71 T->C                                                            | 43       | 1.0 | 106      | 10   |
| TH10386 | fliA-156/-137           | fliA+5/-15    | TH9603   | -33 G->A                                                            | 108      | 10  | 36       | 2.4  |
| TH10387 | fliA-156/-137           | fliA+5/-15    | TH9604   | -41 A->G                                                            | 3.3      | 0.1 | 113      | 8.8  |
| TH10388 | fliA-156/-137           | fliA+5/-15    | TH9600   | -27 A->G                                                            | 88       | 6.4 | 51       | 2.8  |

**Table S10 (continued).** Activities and PCR details for mutants constructed in this study.

| Strain  | PCR           |            |          | Mutation            | Class 2  |      | Class 3  |     |
|---------|---------------|------------|----------|---------------------|----------|------|----------|-----|
|         | Primer #1     | Primer #2  | Template |                     | Activity | SD   | Activity | SD  |
| TH10389 | fliA-156/-137 | fliA+5/-15 | TH9597   | -40 T->C            | 25       | 3.3  | 110      | 2.4 |
| TH10390 | fliA-156/-137 | fliA+5/-15 | TH437    | -48 G->A            | 117      | 12   | 90       | 1.8 |
| TH10391 | fliA-156/-137 | fliA+5/-15 | TH437    | -43 G->A            | 66       | 6.6  | 109      | 7.1 |
| TH10392 | fliA-156/-137 | fliA+5/-15 | TH437    | -84 T->C            | 59       | 4.4  | 114      | 4.6 |
| TH10393 | fliA-156/-137 | fliA+5/-15 | TH437    | -38 A->G            | 4.5      | 0.04 | 111      | 7.1 |
| TH10394 | fliA-156/-137 | fliA+5/-15 | TH437    | -74 T->G            | 61       | 2.4  | 110      | 8.7 |
| TH10423 | fliA-156/-137 | fliA+5/-15 | TH437    | Δ-67T               | 16       | 0.6  | 115      | 3.9 |
| TH10424 | fliA-156/-137 | fliA+5/-15 | TH437    | -95 A->G            | 28       | 2.1  | 111      | 8.1 |
| TH10425 | fliA-156/-137 | fliA+5/-15 | TH437    | -77 G->A, -83 T->C  | 21       | 0.4  |          |     |
| TH10426 | fliA-156/-137 | fliA+5/-15 | TH437    | -96 A->T, -129 G->C |          |      |          |     |
| TH10427 | fliA-156/-137 | fliA+5/-15 | TH437    | -28 T->C            | 113      | 17   | 43       | 1.9 |
| TH10428 | fliA-156/-137 | fliA+5/-15 | TH437    | -58 A->G            | 61       | 1.9  | 108      | 2.3 |
| TH10429 | fliA-156/-137 | fliA+5/-15 | TH437    | -49 A->G            | 101      | 3.8  | 65       | 18  |
| TH10430 | fliA-156/-137 | fliA+5/-15 | TH437    | -53 C->T            | 104      | 3.5  | 54       | 3.2 |
| TH10431 | fliA-156/-137 | fliA+5/-15 | TH437    | -46 A->G            | 102      | 3.1  | 90       | 7.8 |
| TH10432 | fliA-156/-137 | fliA+5/-15 | TH437    | -82 T->C            | 43       | 0.7  | 111      | 6.5 |
| TH10433 | fliA-156/-137 | fliA+5/-15 | TH437    | -29 A->T            | 99       | 2.2  | 43       | 0.4 |
| TH10434 | fliA-156/-137 | fliA+5/-15 | TH437    | -83 T->C            | 40       | 4.2  | 107      | 1.9 |
| TH10435 | fliA-156/-137 | fliA+5/-15 | TH437    | -78 A->T            | 72       | 6.5  | 111      | 6.2 |
| TH10436 | fliA-156/-137 | fliA+5/-15 | TH437    | -38 A->T            | 4.1      | 0.3  | 109      | 5.0 |
| TH10437 | fliA-156/-137 | fliA+5/-15 | TH437    | -30 G->A            | 103      | 3.7  | 3.2      | 0.2 |
| TH10438 | fliA-156/-137 | fliA+5/-15 | TH437    | -94 A->G            | 32       | 0.5  | 109      | 4.0 |
| TH10439 | fliA-156/-137 | fliA+5/-15 | TH437    | -83 T->G            | 36       | 1.3  | 113      | 5.9 |
| TH10440 | fliA-156/-137 | fliA+5/-15 | TH437    | -27 A->C            | 99       | 8.9  | 27       | 0.1 |
| TH10441 | fliA-156/-137 | fliA+5/-15 | TH437    | -92 A->G            | 15       | 1.2  | 112      | 2.9 |
| TH10442 | fliA-156/-137 | fliA+5/-15 | TH437    | -70 T->A            | 7.7      | 0.3  | 111      | 11  |
| TH10443 | fliA-156/-137 | fliA+5/-15 | TH437    | -49 A->T            | 85       | 3.7  | 87       | 4.3 |
| TH10457 | fliA-156/-137 | fliA+5/-15 | TH437    | -103 A->G           | 55       | 2.3  | 112      | 6.1 |
| TH10458 | fliA-156/-137 | fliA+5/-15 | TH437    | Δ-33->-155          | 5.0      | 0.3  | 3.6      | 0.7 |
| TH10459 | fliA-156/-137 | fliA+5/-15 | TH437    | -39 A->G            | 12       | 0.2  | 110      | 3.9 |
| TH10460 | fliA-156/-137 | fliA+5/-15 | TH437    | -37 T->C, -102 T->C | 2.4      | 0.2  | 114      | 12  |
| TH10461 | fliA-156/-137 | fliA+5/-15 | TH437    | -99 G->T            | 74       | 4.8  | 109      | 7.4 |
| TH10462 | fliA-156/-137 | fliA+5/-15 | TH437    | -79 T->C            | 63       | 5.4  | 110      | 8.6 |
| TH10463 | fliA-156/-137 | fliA+5/-15 | TH437    | -61 A->T            | 140      | 17   | 111      | 2.9 |
| TH10464 | fliA-156/-137 | fliA+5/-15 | TH437    | -63 A->G            | 27       | 1.5  | 107      | 1.6 |
| TH10465 | fliA-156/-137 | fliA+5/-15 | TH437    | -41 A->T            | 3.3      | 0.2  | 106      | 2.4 |
| TH10856 | fliA-70S      | fliA+27/+8 | TH437    | -70 T->G            | 7.5      | 0.8  |          |     |
| TH10857 | fliA-71R      | fliA+27/+8 | TH437    | -71 T->A            | 72       | 4.9  |          |     |
| TH10858 | fliA-71R      | fliA+27/+8 | TH437    | -71 T->G            | 17       | 1.4  |          |     |
| TH10859 | fliA-72B      | fliA+27/+8 | TH437    | -72 A->G            | 66       | 1.3  |          |     |
| TH10860 | fliA-72B      | fliA+27/+8 | TH437    | -72 A->C            | 34       | 2.9  |          |     |
| TH10861 | fliA-73R      | fliA+27/+8 | TH437    | -73 T->G            | 4.4      | 0.4  |          |     |

**Table S10 (continued).** Activities and PCR details for mutants constructed in this study.

| Strain  | PCR       |            |          | Mutation  | Class 2  |     | Class 3  |    |
|---------|-----------|------------|----------|-----------|----------|-----|----------|----|
|         | Primer #1 | Primer #2  | Template |           | Activity | SD  | Activity | SD |
| TH10862 | fliA-75D  | fliA+27/+8 | TH437    | -75 C->T  | 111      | 2.7 |          |    |
| TH10863 | fliA-75D  | fliA+27/+8 | TH437    | -75 C->A  | 61       | 1.5 |          |    |
| TH10864 | fliA-75D  | fliA+27/+8 | TH437    | -75 C->G  | 99       | 5.7 |          |    |
| TH10865 | fliA-76D  | fliA+27/+8 | TH437    | -76 C->T  | 93       | 3.2 |          |    |
| TH10866 | fliA-76D  | fliA+27/+8 | TH437    | -76 C->A  | 63       | 4.4 |          |    |
| TH10867 | fliA-89D  | fliA+27/+8 | TH437    | -89 C->T  | 73       | 4.4 |          |    |
| TH10868 | fliA-89D  | fliA+27/+8 | TH437    | -89 C->A  | 116      | 9.2 |          |    |
| TH10869 | fliA-90R  | fliA+27/+8 | TH437    | -90 C->G  | 129      | 4.0 |          |    |
| TH10870 | fliA-96B  | fliA+27/+8 | TH437    | -96 A->G  | 131      | 5.9 |          |    |
| TH10871 | fliA-96B  | fliA+27/+8 | TH437    | -96 A->C  | 50       | 3.4 |          |    |
| TH10872 | fliA-100B | fliA+27/+8 | TH437    | -100 A->G | 121      | 6.6 |          |    |
| TH10873 | fliA-100B | fliA+27/+8 | TH437    | -100 A->T | 74       | 1.2 |          |    |
| TH10920 | fliA-70S  | fliA+27/+8 | TH437    | -70 T->C  | 21       | 0.9 |          |    |
| TH10921 | fliA-73R  | fliA+27/+8 | TH437    | -73 T->A  | 29       | 0.4 |          |    |
| TH10922 | fliA-76D  | fliA+27/+8 | TH437    | -76 C->G  | 67       | 7.3 |          |    |
| TH10923 | fliA-89D  | fliA+27/+8 | TH437    | -89 C->G  | 112      | 4.7 |          |    |
| TH10924 | fliA-100B | fliA+27/+8 | TH437    | -100 A->C | 116      | 3.9 |          |    |
| TH11186 | fliA-72B  | fliA+27/+8 | TH437    | -72 A->T  | 77       | 1.8 |          |    |
| TH11187 | fliA-66V  | fliA+27/+8 | TH437    | -66 T->C  | 108      | 6.1 |          |    |
| TH11188 | fliA-66V  | fliA+27/+8 | TH437    | -66 T->G  | 92       | 3.2 |          |    |
| TH11189 | fliA-67V  | fliA+27/+8 | TH437    | -67 T->A  | 113      | 6.4 |          |    |
| TH11190 | fliA-67V  | fliA+27/+8 | TH437    | -67 T->C  | 107      | 11  |          |    |
| TH11191 | fliA-68D  | fliA+27/+8 | TH437    | -68 C->T  | 103      | 7.4 |          |    |
| TH11192 | fliA-68D  | fliA+27/+8 | TH437    | -68 C->G  | 103      | 2.9 |          |    |
| TH11193 | fliA-91B  | fliA+27/+8 | TH437    | -91 A->T  | 66       | 2.2 |          |    |
| TH11194 | fliA-91B  | fliA+27/+8 | TH437    | -91 A->G  | 82       | 5.4 |          |    |
| TH11195 | fliA-69D  | fliA+27/+8 | TH437    | -69 C->T  | 74       | 0.4 |          |    |
| TH11196 | fliA-69D  | fliA+27/+8 | TH437    | -69 C->A  | 38       | 0.4 |          |    |
| TH11197 | fliA-69D  | fliA+27/+8 | TH437    | -69 C->G  | 30       | 0.9 |          |    |
| TH11198 | fliA-65D  | fliA+27/+8 | TH437    | -65 C->A  | 58       | 1.6 |          |    |
| TH11199 | fliA-65D  | fliA+27/+8 | TH437    | -65 C->T  | 74       | 5.6 |          |    |
| TH11200 | fliA-64H  | fliA+27/+8 | TH437    | -64 G->T  | 45       | 1.7 |          |    |
| TH11201 | fliA-64H  | fliA+27/+8 | TH437    | -64 G->A  | 72       | 6.1 |          |    |
| TH11202 | fliA-63Y  | fliA+27/+8 | TH437    | -63 A->C  | 25       | 0.5 |          |    |
| TH11203 | fliA-62R  | fliA+27/+8 | TH437    | -62 T->A  | 30       | 0.7 |          |    |
| TH11204 | fliA-62R  | fliA+27/+8 | TH437    | -62 T->G  | 4.1      | 0.3 |          |    |
| TH11205 | fliA-61S  | fliA+27/+8 | TH437    | -61 A->C  | 86       | 3.1 |          |    |
| TH11206 | fliA-60H  | fliA+27/+8 | TH437    | -60 G->T  | 32       | 0.5 |          |    |
| TH11207 | fliA-60H  | fliA+27/+8 | TH437    | -60 G->A  | 93       | 2.8 |          |    |
| TH11208 | fliA-60H  | fliA+27/+8 | TH437    | -60 G->C  | 48       | 2.4 |          |    |
| TH11209 | fliA-74M  | fliA+27/+8 | TH437    | -74 T->A  | 57       | 2.1 |          |    |
| TH11210 | fliA-61S  | fliA+27/+8 | TH437    | -61 A->G  | 76       | 5.3 |          |    |

**Table S10 (continued).** Activities and PCR details for mutants constructed in this study.

| Strain  | PCR          |            |          | Mutation           | Class 2  |     | Class 3  |    |
|---------|--------------|------------|----------|--------------------|----------|-----|----------|----|
|         | Primer #1    | Primer #2  | Template |                    | Activity | SD  | Activity | SD |
| TH11243 | fliA-63Y     | fliA+27/+8 | TH437    | -63 A->T           | 51       | 1.0 |          |    |
| TH11421 | fliA-96T     | fliA+27/+8 | TH437    | -96 A->T           | 61       | 0.4 |          |    |
| TH11422 | fliA-91C     | fliA+27/+8 | TH437    | -91 A->C           | 64       | 3.1 |          |    |
| TH11423 | fliA-68A     | fliA+27/+8 | TH437    | -68 C->A           | 91       | 1.2 |          |    |
| TH11424 | fliA-67G     | fliA+27/+8 | TH437    | -67 T->G           | 99       | 3.5 |          |    |
| TH11425 | fliA-66A     | fliA+27/+8 | TH437    | -66 T->A           | 78       | 2.8 |          |    |
| TH11426 | fliA-65G     | fliA+27/+8 | TH437    | -65 C->G           | 73       | 11  |          |    |
| TH11427 | fliA-64C     | fliA+27/+8 | TH437    | -64 G->C           | 61       | 0.4 |          |    |
| TH11493 | fliA-74C     | fliA+27/+8 | TH437    | -74 T->C           | 88       | 4.1 |          |    |
| TH11496 | fliA-90A     | fliA+27/+8 | TH437    | -90 C->A           | 107      | 4.6 |          |    |
| TH11668 | fliA-81V     | fliA+27/+8 | TH437    | -81 T->G           | 50       | 1.9 |          |    |
| TH11669 | fliA-81V     | fliA+27/+8 | TH437    | -81 T->A           | 65       | 2.6 |          |    |
| TH11670 | fliA-104D    | fliA+27/+8 | TH437    | -104 C->G          | 111      | 4.8 |          |    |
| TH11671 | fliA-104D    | fliA+27/+8 | TH437    | -104 C->A          | 141      | 3.3 |          |    |
| TH11672 | fliA-105B    | fliA+27/+8 | TH437    | -105 A->T          | 148      | 6.8 |          |    |
| TH11673 | fliA-105B    | fliA+27/+8 | TH437    | -105 A->G          | 106      | 5.0 |          |    |
| TH11674 | fliA-82R     | fliA+27/+8 | TH437    | -82 T->A           | 57       | 3.9 |          |    |
| TH11675 | fliA-82R     | fliA+27/+8 | TH437    | -82 T->G           | 34       | 0.8 |          |    |
| TH11676 | fliA-84R     | fliA+27/+8 | TH437    | -84 T->A           | 82       | 8.0 |          |    |
| TH11677 | fliA-84R     | fliA+27/+8 | TH437    | -84 T->G           | 64       | 1.1 |          |    |
| TH11678 | fliA-103Y    | fliA+27/+8 | TH437    | -103 A->T          | 57       | 4.5 |          |    |
| TH11679 | fliA-83A     | fliA+27/+8 | TH437    | -83 T->A           | 58       | 1.6 |          |    |
| TH11695 | fliA-91B     | fliA+27/+8 | TH11198  | -65 C->A, -91 A->G | 45       | 4.0 |          |    |
| TH11696 | fliA-91B     | fliA+27/+8 | TH11198  | -65 C->A, -91 A->C | 33       | 1.0 |          |    |
| TH11697 | fliA-91B     | fliA+27/+8 | TH11198  | -65 C->A, -91 A->T | 30       | 0.9 |          |    |
| TH11698 | fliA-91B     | fliA+27/+8 | TH11199  | -65 C->T, -91 A->G | 56       | 4.2 |          |    |
| TH11699 | fliA-91B     | fliA+27/+8 | TH11199  | -65 C->T, -91 A->C | 41       | 1.8 |          |    |
| TH11700 | fliA-91B     | fliA+27/+8 | TH11426  | -65 C->G, -91 A->G | 62       | 5.5 |          |    |
| TH11701 | fliA-91B     | fliA+27/+8 | TH11426  | -65 C->G, -91 A->C | 45       | 1.7 |          |    |
| TH11702 | fliA-65D-63B | fliA+27/+8 | TH437    | -63 A->T, -65 C->T | 24       | 0.9 |          |    |
| TH11703 | fliA-65D-63B | fliA+27/+8 | TH437    | -63 A->T, -65 C->G | 32       | 1.3 |          |    |
| TH11704 | fliA-72B-64H | fliA+27/+8 | TH437    | -64 G->A, -72 A->C | 20       | 1.2 |          |    |
| TH11705 | fliA-72B-64H | fliA+27/+8 | TH437    | -64 G->C, -72 A->C | 15       | 0.3 |          |    |
| TH11706 | fliA-72B-64H | fliA+27/+8 | TH437    | -64 G->A, -72 A->G | 43       | 1.3 |          |    |
| TH11707 | fliA-72B-64H | fliA+27/+8 | TH437    | -64 G->C, -72 A->G | 33       | 1.3 |          |    |
| TH11708 | fliA-72B-64H | fliA+27/+8 | TH437    | -64 G->T, -72 A->G | 25       | 1.6 |          |    |
| TH11709 | fliA-74V-71V | fliA+27/+8 | TH437    | -71 T->C, -74 T->A | 38       | 1.1 |          |    |
| TH11710 | fliA-74V-71V | fliA+27/+8 | TH437    | -71 T->G, -74 T->G | 14       | 0.3 |          |    |
| TH11711 | fliA-64H-61T | fliA+27/+8 | TH437    | -61 A->T, -64 G->T | 64       | 2.6 |          |    |
| TH11712 | fliA-64H-61T | fliA+27/+8 | TH437    | -61 A->T, -64 G->A | 113      | 1.6 |          |    |
| TH11713 | fliA-70V-61T | fliA+27/+8 | TH437    | -61 A->T, -70 T->C | 33       | 1.2 |          |    |
| TH11714 | fliA-70V-61T | fliA+27/+8 | TH437    | -61 A->T, -70 T->G | 11       | 0.8 |          |    |



**Table S10 (continued).** Activities and PCR details for mutants constructed in this study.

| Strain  | PCR            |            |          | Mutation                                  | Class 2  |     | Class 3  |    |
|---------|----------------|------------|----------|-------------------------------------------|----------|-----|----------|----|
|         | Primer #1      | Primer #2  | Template |                                           | Activity | SD  | Activity | SD |
| TH11715 | fliA-96B       | fliA+27/+8 | TH11195  | -69 C->T, -96 A->T                        | 36       | 1.9 |          |    |
| TH11716 | fliA-96B       | fliA+27/+8 | TH11195  | -69 C->T, -96 A->G                        | 91       | 3.3 |          |    |
| TH11717 | fliA-96B       | fliA+27/+8 | TH11196  | -69 C->A, -96 A->G                        | 52       | 1.8 |          |    |
| TH11718 | fliA-96B       | fliA+27/+8 | TH11197  | -69 C->G, -96 A->T                        | 12       | 0.6 |          |    |
| TH11719 | fliA-96B       | fliA+27/+8 | TH11197  | -69 C->G, -96 A->G                        | 40       | 1.0 |          |    |
| TH11720 | fliA-100B      | fliA+27/+8 | TH10865  | -76 C->T, -100 A->G                       | 111      | 5.3 |          |    |
| TH11721 | fliA-100B      | fliA+27/+8 | TH10865  | -76 C->T, -100 A->T                       | 63       | 4.6 |          |    |
| TH11722 | fliA-100B      | fliA+27/+8 | TH10866  | -76 C->A, -100 A->G                       | 70       | 1.4 |          |    |
| TH11723 | fliA-100B      | fliA+27/+8 | TH10922  | -76 C->G, -100 A->G                       | 89       | 5.4 |          |    |
| TH11724 | fliA-100B      | fliA+27/+8 | TH10922  | -76 C->G, -100 A->T                       | 47       | 1.4 |          |    |
| TH11725 | fliA-103Y      | fliA+27/+8 | TH437    | -103 A->C                                 | 44       | 2.4 |          |    |
| TH11730 | fliA-74V-71V   | fliA+27/+8 | TH437    | -71 T->A, -74 T->G                        | 46       | 1.7 |          |    |
| TH11731 | fliA-96B       | fliA+27/+8 | TH11196  | -69 C->A, -96 A->T                        | 17       | 0.2 |          |    |
| TH11788 | fliA-105C      | fliA+27/+8 | TH437    | -105 A->C                                 | 171      | 7.7 |          |    |
| TH11789 | fliA-104T      | fliA+27/+8 | TH437    | -104 C->T                                 | 117      | 4.8 |          |    |
| TH11790 | fliA-81C       | fliA+27/+8 | TH437    | -81 T->C                                  | 64       | 5.1 |          |    |
| TH11791 | fliAdel-86     | fliA+27/+8 | TH437    | $\Delta$ -86T                             | 93       | 2.6 |          |    |
| TH11792 | fliAdel-85     | fliA+27/+8 | TH437    | $\Delta$ -85C                             | 90       | 1.0 |          |    |
| TH11793 | fliAdel-84     | fliA+27/+8 | TH437    | $\Delta$ -84T                             | 62       | 2.0 |          |    |
| TH11794 | fliAdel-80     | fliA+27/+8 | TH437    | $\Delta$ -80A                             | 60       | 2.9 |          |    |
| TH11795 | fliAdel-79     | fliA+27/+8 | TH437    | $\Delta$ -79T                             | 53       | 1.1 |          |    |
| TH11796 | fliA-85N-86    | fliA+27/+8 | TH437    | ins-86G-85                                | 17       | 1.1 |          |    |
| TH11797 | fliA-85N-86    | fliA+27/+8 | TH437    | ins-86A-85                                | 20       | 1.1 |          |    |
| TH11798 | fliA-81N-82    | fliA+27/+8 | TH437    | ins-82G-81                                | 7.3      | 0.4 |          |    |
| TH11807 | fliA-81N-82    | fliA+27/+8 | TH437    | ins-82C-81                                | 6.3      | 0.3 |          |    |
| TH11947 | fliAdel-86-85  | fliA+27/+8 | TH437    | $\Delta$ -85C, $\Delta$ -86T              | 34       | 0.8 |          |    |
| TH11948 | fliAdel-86-79  | fliA+27/+8 | TH437    | $\Delta$ -79T, $\Delta$ -86T              | 20       | 0.6 |          |    |
| TH11949 | fliAdel-85-80  | fliA+27/+8 | TH437    | $\Delta$ -80A, $\Delta$ -85C              | 39       | 1.4 |          |    |
| TH11950 | fliAdel-80-79  | fliA+27/+8 | TH437    | $\Delta$ -79T, $\Delta$ -80A              | 13       | 0.9 |          |    |
| TH11951 | fliA-81T-82    | fliA+27/+8 | TH437    | ins-82T-81                                | 9.1      | 0.4 |          |    |
| TH11952 | fliA-84AAAA    | fliA+27/+8 | TH437    | -84 T->A, -83 T->A,<br>-82 T->A, -81 T->A | 84       | 3.9 |          |    |
| TH12349 | fliA-81flgB11  | fliA+27/+8 | TH437    | ins -82<br>ACGCATTTTGC -81                | 2.8      | 0.1 |          |    |
| TH12350 | fliA-81flgB10  | fliA+27/+8 | TH437    | ins -82 CGCATTTTGC<br>-81                 | 2.5      | 0.1 |          |    |
| TH12352 | fliA-85fliE11  | fliA+27/+8 | TH437    | ins -86<br>AGGTTTTTTAT -85                | 5.4      | 0.2 |          |    |
| TH12353 | fliA-85fliE10  | fliA+27/+8 | TH437    | ins -86 GGTTTTTTAT<br>-85                 | 5.6      | 0.1 |          |    |
| TH12496 | fliA-73R       | fliA+27/+8 | TH437    | -66 T->C, -73 T->A                        | 23       | 0.3 |          |    |
| TH12536 | fliA-156/-137  | fliA+5/-15 | TH437    | -33 G->A, -121 A->G                       |          |     |          |    |
| TH9314  | fliD-196/-177F | fliC13     | TH437    | -44 G->A                                  |          |     |          |    |

**Table S10 (continued).** Activities and PCR details for mutants constructed in this study.

| Strain | PCR            |             |          | Mutation  | Class 2  |     | Class 3  |     |
|--------|----------------|-------------|----------|-----------|----------|-----|----------|-----|
|        | Primer #1      | Primer #2   | Template |           | Activity | SD  | Activity | SD  |
| TH9316 | fliD-196/-177F | fliC13      | TH437    | -107 A->G |          |     |          |     |
| TH9317 | fliD-196/-177F | fliC13      | TH437    | -96 T->C  |          |     |          |     |
| TH9318 | fliD-196/-177F | fliC13      | TH437    | -90 G->A  |          |     |          |     |
| TH9319 | fliD-196/-177F | fliC13      | TH437    | -34 T->C  |          |     |          |     |
| TH9320 | fliD-196/-177F | fliC13      | TH437    | -28 A->G  |          |     |          |     |
| TH9322 | fliD-196/-177F | fliC13      | TH437    | -23 T->A  |          |     |          |     |
| TH9323 | fliD-196/-177F | fliC13      | TH437    | -41 A->G  |          |     |          |     |
| TH9324 | fliD-196/-177F | fliC13      | TH437    | -26 T->C  |          |     |          |     |
| TH9326 | fliD-196/-177F | fliC13      | TH437    | -17 T->C  |          |     |          |     |
| TH9327 | fliD-196/-177F | fliC13      | TH437    | -42 T->C  |          |     |          |     |
| TH9329 | fliD-196/-177F | fliC13      | TH437    | -48 T->C  |          |     |          |     |
| TH9454 |                |             |          | -44 G->A  | 106      | 15  | 26       | 2.2 |
| TH9456 |                |             |          | -107 A->G | 72       | 5.1 | 92       | 14  |
| TH9457 |                |             |          | -96 T->C  | 52       | 4.4 | 92       | 12  |
| TH9458 |                |             |          | -90 G->A  | 63       | 4.8 | 92       | 12  |
| TH9459 |                |             |          | -34 T->C  | 79       | 8.0 | 89       | 2.0 |
| TH9460 |                |             |          | -28 A->G  | 59       | 3.8 | 76       | 0.9 |
| TH9462 |                |             |          | -23 T->A  | 127      | 8.1 | 67       | 0.5 |
| TH9463 |                |             |          | -41 A->G  | 123      | 16  | 88       | 3.9 |
| TH9464 |                |             |          | -26 T->C  | 77       | 3.5 | 129      | 1.5 |
| TH9466 |                |             |          | -17 T->C  | 174      | 15  | 111      | 1.5 |
| TH9467 |                |             |          | -42 T->C  | 56       | 1.6 | 98       | 1.9 |
| TH9469 |                |             |          | -48 T->C  | 201      | 5.4 | 102      | 4.8 |
| TH9586 | fliD-196/-177F | fliD+4/-16  | TH437    | -62 C->T  | 59       | 5.6 | 90       | 6.1 |
| TH9587 | fliD-196/-177F | fliD+4/-16  | TH437    | -64 A->C  | 101      | 6.5 | 75       | 2.1 |
| TH9588 | fliD-196/-177F | fliD+4/-16  | TH437    | -95 T->C  | 25       | 1.1 | 96       | 15  |
| TH9589 | fliD-196/-177F | fliD+4/-16  | TH437    | -40 A->G  | 63       | 12  | 87       | 3.1 |
| TH9590 | fliD-196/-177F | fliD+4/-16  | TH437    | -120 A->G | 37       | 2.8 | 96       | 12  |
| TH9591 | fliD-196/-177F | fliD+4/-16  | TH437    | -102 T->A | 60       | 5.6 | 94       | 12  |
| TH9592 | fliD-196/-177F | fliD+4/-16  | TH437    | -121 G->T | 54       | 4.7 | 96       | 14  |
| TH9593 | fliD-196/-177F | fliD+4/-16  | TH437    | -23 T->C  | 57       | 3.0 | 65       | 2.8 |
| TH9300 | flgM5'UP       | flgM+24/+5R | TH437    | -65 C->T  | 94       | 2.7 | 1.6      | 0.2 |

**Table S11.** Primers used in the construction of mutants.

| <b>Primer name</b> | <b>Sequence</b>                                                |
|--------------------|----------------------------------------------------------------|
| flgK -33           | catgatgggttccttttaatccttcaatactcgttgRtatcggcagcgcactacgtg      |
| flgK -33C          | catgatgggttccttttaatccttcaatactcgttgGtatcggcagcgcactacgtg      |
| flgK -33T          | catgatgggttccttttaatccttcaatactcgttgAtatcggcagcgcactacgtg      |
| flgK -34           | atgatgggttccttttaatccttcaatactcgttgRatcggcagcgcactacgtg        |
| flgK -34A          | atgatgggttccttttaatccttcaatactcgttgAatcggcagcgcactacgtg        |
| flgK -35           | tgatgggttccttttaatccttcaatactcgttgBtcggcagcgcactacgtg          |
| flgK -36           | gatgggttccttttaatccttcaatactcgttgRcggcagcgcactacgtgg           |
| flgK -37           | atgggttccttttaatccttcaatactcgttgTatDggcagcgcactacgtggac        |
| flgK -38           | tggttccttttaatccttcaatactcgttgTatcHgcagcgcactacgtggac          |
| flgK -38M          | tggttccttttaatccttcaatactcgttgTatcMgcagcgcactacgtggac          |
| flgK -39           | gggttccttttaatccttcaatactcgttgTatcgHcagcgcactacgtggacttg       |
| flgK -39A          | gggttccttttaatccttcaatactcgttgTatcgAcagcgcactacgtggacttg       |
| flgK -40           | gttccttttaatccttcaatactcgttgTatcggRagcgcactacgtggacttg         |
| flgK -41           | ttccttttaatccttcaatactcgttgTatcggcYgcgactacgtggacttg           |
| flgK -41A          | ttccttttaatccttcaatactcgttgTatcggcTgcgactacgtggacttg           |
| flgK -41G          | ttccttttaatccttcaatactcgttgTatcggcCgcgactacgtggacttg           |
| flgK -52           | ttaatccttcaatactcgttgTatcggcagcgcactacgtHgacttgagcaatttaaaag   |
| flgK -52A          | ttaatccttcaatactcgttgTatcggcagcgcactacgtTgacttgagcaatttaaaag   |
| flgK -52G          | ttaatccttcaatactcgttgTatcggcagcgcactacgtCgacttgagcaatttaaaag   |
| flgK -53           | ttaatccttcaatactcgttgTatcggcagcgcactacgtgHacttgagcaatttaaaag   |
| flgK -53G          | ttaatccttcaatactcgttgTatcggcagcgcactacgtgCacttgagcaatttaaaag   |
| flgK -54           | ttcaatactcgttgTatcggcagcgcactacgtggScttgagcaatttaaaagagattg    |
| flgK -54G          | ttcaatactcgttgTatcggcagcgcactacgtggGcttgagcaatttaaaagagattg    |
| flgK -55           | tcaatactcgttgTatcggcagcgcactacgtggaRttgagcaatttaaaagagattgtc   |
| flgK -55G          | tcaatactcgttgTatcggcagcgcactacgtggaGttgagcaatttaaaagagattgtc   |
| flgK -56           | caatactcgttgTatcggcagcgcactacgtggacRtgagcaatttaaaagagattgtcg   |
| flgK -57           | aatactcgttgTatcggcagcgcactacgtggactRgagcaatttaaaagagattgtcg    |
| flgK -58           | atactcgttgTatcggcagcgcactacgtggacttYagcaatttaaaagagattgtcg     |
| flgK -58T          | atactcgttgTatcggcagcgcactacgtggacttTagcaatttaaaagagattgtcg     |
| flgK -59           | tactcgttgTatcggcagcgcactacgtggacttgCgcaatttaaaagagattgtcg      |
| flgK -34B-36G      | catgatgggttccttttaatccttcaatactcgttgTtVaCggcagcgcactacgtgg     |
| flgK -34B-36C      | catgatgggttccttttaatccttcaatactcgttgTtVaGcggcagcgcactacgtgg    |
| flgK -34B-36T      | catgatgggttccttttaatccttcaatactcgttgTtVaAcggcagcgcactacgtgg    |
| flgK -37W-40C      | gatgggttccttttaatccttcaatactcgttgTtWggGagcgcactacgtggacttg     |
| flgK -37H-40T      | gatgggttccttttaatccttcaatactcgttgTtDggAagcgcactacgtggacttg     |
| flgK -55H-56C      | caatactcgttgTtToggcagcgcactacgtggaDGTgagcaatttaaaagagattgtcg   |
| flgK -55H-56G      | caatactcgttgTtToggcagcgcactacgtggaDCTgagcaatttaaaagagattgtcg   |
| flgK -55H-56T      | caatactcgttgTtToggcagcgcactacgtggaDATgagcaatttaaaagagattgtcg   |
| flgK -57B-59C      | tactcgttgTtToggcagcgcactacgtggactVgGgcaatttaaaagagattgtcg      |
| flgK -57B-59G      | tactcgttgTtToggcagcgcactacgtggactVgCgcaatttaaaagagattgtcg      |
| flgKdel-43         | gttccttttaatccttcaatactcgttgTtTcggcaggactacgtggacttgagcaatt    |
| flgKdel-45         | tccttttaatccttcaatactcgttgTtTcggcagcgcactacgtggacttgagcaattta  |
| flgKdel-47         | cttttaatccttcaatactcgttgTtTcggcagcgcacactacgtggacttgagcaatttaa |
| flgKdel-50         | taatccttcaatactcgttgTtToggcagcgcactacgtggacttgagcaatttaaaagag  |
| flgKdel-47-43      | ccttttaatccttcaatactcgttgTtTcggcaggacacgtggacttgagcaatttaaa    |

**Table S11 (continued).** Primers used in the construction of mutants.

| <b>Primer name</b>  | <b>Sequence</b>                                                 |
|---------------------|-----------------------------------------------------------------|
| flgKdel-47-45       | ccttttaatccttcaatactogttggttatcggcagcgcacgtggacttgagcaatttaaa   |
| flgKdel-50-43       | ttaatccttcaatactogttggttatcggcaggactactggacttgagcaatttaaaagag   |
| flgKdel-50-45       | ttaatccttcaatactogttggttatcggcagcgcactactggacttgagcaatttaaaagag |
| flgK-44N-43         | tccttttaatccttcaatactogttggttatcggcagcNgactacgtggacttgagcaatt   |
| flgK-47N-46         | ttttaatccttcaatactogttggttatcggcagcgcacNtacgtggacttgagcaatttaa  |
| flgK-50N-49         | taatccttcaatactogttggttatcggcagcgcactacNgtggacttgagcaatttaaaag  |
| flgK-47N-46,-44N-43 | tttaatccttcaatactogttggttatcggcagcNgacNtacgtggacttgagcaatttaa   |
| flgK-50N-49,-44N-43 | aatccttcaatactogttggttatcggcagcNgactacNgtggacttgagcaatttaaaag   |
| flgK-50N-49,-47N-46 | aatccttcaatactogttggttatcggcagcgcacNtacNgtggacttgagcaatttaaaag  |
| flgKaerDown         | attaatcaagctggacatgatgggttccttttaatccttcaatCAGATGTTATTTTCGGCGC  |
| flgKaeroc           | attaatcaagctggacatgatgggttccttttaatccttcaatactcgttgATtTcggcGg   |
| flgKaerUp           | gcaaacctacagcgcgaatctcgcacaatctccttttaaTGCGATCCAGAGCAATTTTAAC   |
| flgKchevDown        | tcaagctggacatgatgggttccttttaatccttcaatTTTTTAGTGTATTCGGCAATGAG   |
| flgKcheVoct         | aatccttcaatactogttggttatcggcagcgcactacgtAAaAtGgagcaatttaaaagag  |
| flgKcheVUp          | caaacctacagcgcgaatctcgcacaatctccttttaaTTTTTCTGTTTTCCCGTTTTAGC   |
| flgKmotADown        | atcaagctggacatgatgggttccttttaatccttcaatGTGGAATAATATCGGCAGCATC   |
| flgKmotAoc          | ctggacatgatgggttccttttaatccttcaatactcgttgAatacggcagcgcactacgtA  |
| flgKmotAU           | AaGttTagcaatttaaaagagattgtc                                     |
| flgKtarDown         | aaggtcagcaaacctacagcgcgaatctcgcacaatctccttttaaCGCCATCCCGCGCAG   |
| flgKtaroc           | aatcaagctggacatgatgggttccttttaatccttcaatTATCAACGTTATCGGCACCTG   |
| flgKtarUp           | aatccttcaatactogttggttatcggcagcgcactacgtTAacttTagcaatttaaaagag  |
| fliA-60H            | cagcaaacctacagcgcgaatctcgcacaatctccttttaaACAGCGTATTTCTTTTTGC    |
| fliA-61S            | aataacccttcttttatagccttattccttcgataHaaccctctgtagaaacggataatc    |
| fliA-62R            | gtgaaataacccttcttttatagccttattccttcgatSgaaccctctgtagaaacggat    |
| fliA-63Y            | agtgaaataacccttcttttatagccttattccttcgaRagaaccctctgtagaaacgga    |
| fliA-64C            | aagtgaaataacccttcttttatagccttattccttcgYtagaaccctctgtagaaacgg    |
| fliA-64H            | taagtgaaataacccttcttttatagccttattccttcCatagaaccctctgtagaaacg    |
| fliA-65D            | taagtgaaataacccttcttttatagccttattccttDgatagaaccctctgtagaaacg    |
| fliA-65G            | taagtgaaataacccttcttttatagccttattccttGgatagaaccctctgtagaaacg    |
| fliA-66A            | taagtgaaataacccttcttttatagccttattcctAcgatagaaccctctgtagaaacg    |
| fliA-66V            | taagtgaaataacccttcttttatagccttattcctVcgatagaaccctctgtagaaacg    |
| fliA-67G            | taagtgaaataacccttcttttatagccttattccGtcgatagaaccctctgtagaaacg    |
| fliA-67V            | taagtgaaataacccttcttttatagccttattccVtcgatagaaccctctgtagaaacg    |
| fliA-68A            | ttacataagtgaaataacccttcttttatagccttattcAttcgatagaaccctctgtag    |
| fliA-68D            | ttacataagtgaaataacccttcttttatagccttattcDttcgatagaaccctctgtag    |
| fliA-69D            | ttacataagtgaaataacccttcttttatagccttattDcttcgatagaaccctctgtag    |
| fliA-70S            | ggttacataagtgaaataacccttcttttatagccttattSccttcgatagaaccctctg    |
| fliA-71R            | aggttacataagtgaaataacccttcttttatagccttattRcttcgatagaaccctctg    |
| fliA-72B            | caggttacataagtgaaataacccttcttttatagccttattBcttcgatagaaccctc     |
| fliA-73R            | acaggttacataagtgaaataacccttcttttatagccttattRcttcgatagaaccctc    |
| fliA-74C            | tacaggttacataagtgaaataacccttcttttatagccttattccttcgatagaacc      |
| fliA-74M            | tacaggttacataagtgaaataacccttcttttatagccttattccttcgatagaacc      |
| fliA-75D            | ctacaggttacataagtgaaataacccttcttttatagccttattccttcgatagaacc     |

**Table S11 (continued).** Primers used in the construction of mutants.

| <b>Primer name</b> | <b>Sequence</b>                                                |
|--------------------|----------------------------------------------------------------|
| fliA-76D           | gctacaggttacataaagtgaataacccttctttttagDcttattccttcgatagaacc    |
| fliA-81C           | aggcgctacaggttacataaagtgaataacccttcttttCatagccttattccttcgatag  |
| fliA-81V           | aggcgctacaggttacataaagtgaataacccttcttttVatagccttattccttcgatag  |
| fliA-82R           | aggcgctacaggttacataaagtgaataacccttctttRtatagccttattccttcgatag  |
| fliA-83A           | aggcgctacaggttacataaagtgaataacccttctAttatagccttattccttcgatag   |
| fliA-84R           | aggcgctacaggttacataaagtgaataacccttctRtttatagccttattccttcgatag  |
| fliA-89D           | ccgctaaaaaggcgctacaggttacataaagtgaataacDcttctttttagccttattc    |
| fliA-90A           | gccgctaaaaaggcgctacaggttacataaagtgaataaAccttctttttagccttatt    |
| fliA-90R           | gccgctaaaaaggcgctacaggttacataaagtgaataaRccttctttttagccttatt    |
| fliA-91B           | gccgctaaaaaggcgctacaggttacataaagtgaataaBcccttctttttagccttatt   |
| fliA-91C           | gccgctaaaaaggcgctacaggttacataaagtgaataaCcccttctttttagccttatt   |
| fliA-96B           | cttttagccgctaaaaaggcgctacaggttacataaagtGbaataacccttctttttagc   |
| fliA-96T           | cttttagccgctaaaaaggcgctacaggttacataaagtGtaataacccttctttttagc   |
| fliA-100B          | tgctcttttagccgctaaaaaggcgctacaggttacataBgtgaaataacccttctttta   |
| fliA-103Y          | ctgctcttttagccgctaaaaaggcgctacaggttacYtaagtgaataaacccttctttt   |
| fliA-104D          | ctgctcttttagccgctaaaaaggcgctacaggttacDataaagtgaataaacccttctttt |
| fliA-104T          | ctgctcttttagccgctaaaaaggcgctacaggttacTataaagtgaataaacccttctttt |
| fliA-105B          | tctgctcttttagccgctaaaaaggcgctacaggttBcataaagtgaataaacccttctttt |
| fliA-105C          | tctgctcttttagccgctaaaaaggcgctacaggttCcataaagtgaataaacccttctttt |
| fliA-64H-61T       | gtgaaataacccttctttttagccttattccttctHatTgaaccctctgtagaaacggat   |
| fliA-70V-61T       | gtgaaataacccttctttttagccttattVccttcgatTgaaccctctgtagaaacggat   |
| fliA-65D-63B       | aagtgaataaacccttctttttagccttattccttDgBtagaaccctctgtagaaacgg    |
| fliA-72B-64H       | taagtgaataaacccttctttttagccttBttccttctHatagaaccctctgtagaaacg   |
| fliA-74V-71V       | aggttacataaagtgaataaacccttctttttagcctVtaVtccttcgatagaaccctctg  |
| fliA-85N-86        | ggcgctacaggttacataaagtgaataaacccttNctttttagccttattccttcgatag   |
| fliA-81N-82        | gctacaggttacataaagtgaataaacccttcttttNtatagccttattccttcgatagaac |
| fliA-81T-82        | gctacaggttacataaagtgaataaacccttcttttTtatagccttattccttcgatagaac |
| fliAdel-84         | aggcgctacaggttacataaagtgaataaacccttctttttagccttattccttcgatag   |
| fliAdel-85         | aggcgctacaggttacataaagtgaataaaccctttttttagccttattccttcgatag    |
| fliAdel-86         | aaaaggcgctacaggttacataaagtgaataaacccttctttttagccttattccttcg    |
| fliAdel-80         | gcgctacaggttacataaagtgaataaacccttctttttagccttattccttcgatagaac  |
| fliAdel-79         | gcgctacaggttacataaagtgaataaacccttctttttagccttattccttcgatagaac  |
| fliAdel-86-85      | aggcgctacaggttacataaagtgaataaaccctttttttagccttattccttcgatag    |
| fliAdel-86-79      | gcgctacaggttacataaagtgaataaacccttctttttagccttattccttcgatagaac  |
| fliAdel-85-80      | gcgctacaggttacataaagtgaataaaccctttttttagccttattccttcgatagaac   |
| fliAdel-80-79      | gcgctacaggttacataaagtgaataaacccttctttttagccttattccttcgatagaac  |
| fliA-84AAA         | aggcgctacaggttacataaagtgaataaacccttctAAAAtagccttattccttcgatag  |
| fliA-81flgB11      | gttacataaagtgaataaacccttcttttACGCATTTTGCTatagccttattccttcgatag |
| fliA-81flgB10      | ggttacataaagtgaataaacccttcttttCGCATTTTGCTatagccttattccttcgatag |
| fliA-85fliE11      | tacaggttacataaagtgaataaacccttAGGTTTTTTATctttttagccttattccttc   |
| fliA-85fliE10      | ctacaggttacataaagtgaataaacccttGGTTTTTTATctttttagccttattccttc   |
